# Supplementary material for: Distinct regulatory machineries underlying divergent chromatin landscapes distinguish innate lymphoid cells from T helper cells
Source: Front Immunol. 2023 Dec 1;14:1271879. doi: 10.3389/fimmu.2023.1271879 (PMC10722145; doi:10.3389/fimmu.2023.1271879)
Supplement: Supplementary file 6 [file Table_5.xlsx]

## Sheet: Table6
Table 5 GO terms enriched in Th geneset
ID	Description	GeneRatio	BgRatio	pvalue	p.adjust	qvalue	geneID	Count
GO:1903047	mitotic cell cycle process	101/410	500/8008	9.05458e-36	3.25965e-32	2.87745e-32	Slfn1/Cd28/Zc3h12d/Racgap1/Ncaph/Birc5/Kif2c/Dlgap5/Cenpa/Tacc3/Cit/Kif11/Cdc25b/Spag5/Lmnb1/Bub1/Sgo1/Ncapg2/Cdca8/Ccnf/Kif18b/Cdca5/Cenph/Fancd2/Ndc80/Cdk1/Nusap1/Tpx2/Ccna2/Ncapg/Cdc6/Dbf4/Knstrn/Ube2c/Foxm1/Cdkn2c/Kif4/Ncapd2/Sapcd2/Phf13/Ticrr/Ccnb2/Dtl/Cep55/Aurkb/Mki67/Pola1/Kif14/Ttk/Espl1/Stil/Cenpe/Cenpf/Rnaseh2b/Prkcq/Clspn/Fbxo5/Cks1b/Nuf2/Stmn1/Myb/Brca1/Cdca2/Kntc1/Nsl1/Spc25/Rad51/…	101
GO:0000278	mitotic cell cycle	108/410	594/8008	5.16016e-34	9.28829e-31	8.19922e-31	Slfn1/Cd28/Zc3h12d/Racgap1/Ncaph/Birc5/Kif2c/Ttll12/Dlgap5/Cenpa/Tacc3/Cit/Ska1/Kif11/Cdc25b/E2f8/Spag5/Lmnb1/Bub1/Sgo1/Ncapg2/Cdca8/Ccnf/Kif18b/Cdca5/Cenph/Fancd2/Ndc80/Cdk1/Nusap1/Tpx2/Ccna2/Ncapg/Cdc6/Dbf4/Knstrn/Ube2c/Foxm1/Cdkn2c/Kif4/Ncapd2/Sapcd2/Phf13/Ticrr/Ccnb2/Dtl/Cep55/Aurkb/Mki67/Pola1/Kif14/Ttk/Espl1/Stil/Cenpe/Cenpf/Rnaseh2b/Prkcq/Clspn/Fbxo5/Cks1b/Nuf2/Stmn1/Myb/Brca1/Cdca2/Prkca/…	108
GO:0022402	cell cycle process	119/410	734/8008	1.05685e-32	1.26822e-29	1.11952e-29	Slfn1/Cd28/Zc3h12d/Racgap1/Ncaph/Birc5/Rab11fip4/Kif2c/Dlgap5/Cenpa/Tacc3/Cit/Kif11/Cdc25b/E2f8/Spag5/Lmnb1/Bub1/Sgo1/Ncapg2/Cdca8/Ccnf/Kif18b/Cdca5/Cenph/Fancd2/Ndc80/Rad51ap1/Cdk1/Nusap1/Tpx2/Ccna2/Ncapg/Cdc6/Dbf4/Knstrn/Ube2c/Foxm1/Cdkn2c/Kif4/Ncapd2/Sapcd2/Phf13/Ticrr/Ccnb2/Pclaf/Dtl/Cep55/Aurkb/Mki67/Pola1/Lef1/Kif14/Aspm/Top2a/Knl1/Ttk/Espl1/Esco2/Stil/Cenpe/Cenpf/Rnaseh2b/Prkcq/Clspn/Fbxo5…	119
GO:0007049	cell cycle	144/410	1085/8008	2.57045e-30	2.31341e-27	2.04216e-27	Slfn1/Cd28/Zc3h12d/Racgap1/Ncaph/Birc5/Rab11fip4/Gmnn/Kif2c/Ttll12/Dlgap5/Cenpa/E2f2/Tacc3/Cit/Ska1/Kif11/Cdc25b/E2f8/Spag5/Lmnb1/Bub1/Uhrf1/Sgo1/Ncapg2/Cdca8/Ccnf/Kif18b/Cdca5/Cdca3/Cenph/Fancd2/Ndc80/Rad51ap1/Cdk1/Nusap1/Tpx2/Ccna2/Ncapg/Cdc6/Dbf4/Knstrn/Ube2c/Foxm1/Cdkn2c/Kif4/Ncapd2/Sapcd2/Phf13/Ticrr/Ccnb2/Pclaf/Dtl/Cep55/Aurkb/Mki67/Pola1/Lef1/Kif14/Aspm/Top2a/Knl1/Il10/Ttk/Oip5/Espl1/Esco2…	144
GO:0007059	chromosome segregation	65/410	245/8008	5.63557e-30	4.05761e-27	3.58185e-27	Racgap1/Ncaph/Birc5/Kif2c/Dlgap5/Tacc3/Cit/Ska1/Spag5/Bub1/Sgo1/Ncapg2/Cdca8/Kif18b/Cdca5/Cenph/Fancd2/Ndc80/Nusap1/Ncapg/Cdc6/Knstrn/Ube2c/Ncapd2/Phf13/Aurkb/Mki67/Kif14/Top2a/Knl1/Ttk/Oip5/Espl1/Esco2/Cenpe/Cenpf/Fbxo5/Nuf2/Spc24/Brca1/Cdca2/Kntc1/Nsl1/Spc25/Bub1b/Psrc1/Mad2l1/Nek2/Ccne1/Wrap73/Brip1/Ccnb1/Plk1/Kif22/Ect2/Zwilch/Ccne2/Ska3/Ska2/Haspin/Eme1/Trip13/Cdc20/Cenps/Recql4	65
GO:0000280	nuclear division	67/410	268/8008	3.31134e-29	1.98681e-26	1.75385e-26	Cd28/Racgap1/Ncaph/Birc5/Kif2c/Tacc3/Cit/Kif11/Cdc25b/Spag5/Bub1/Sgo1/Ncapg2/Cdca8/Kif18b/Cdca5/Fancd2/Ndc80/Rad51ap1/Nusap1/Tpx2/Ncapg/Cdc6/Knstrn/Ube2c/Ncapd2/Phf13/Ccnb2/Aurkb/Mki67/Kif14/Aspm/Top2a/Ttk/Espl1/Cenpe/Fbxo5/Nuf2/Cdca2/Kntc1/Nsl1/Rad51/Rad54l/Bub1b/Psrc1/Mad2l1/Kifc1/Mastl/Nek2/Ccne1/Wrap73/Brip1/Ripor2/Ccnb1/Plk1/Kif22/Zwilch/Ccne2/Fignl1/Aurka/Haspin/Chek2/Eme1/Trip13/Cdc20/Chek…	67
GO:0048285	organelle fission	69/410	301/8008	1.33015e-27	6.84076e-25	6.03867e-25	Cd28/Racgap1/Ncaph/Birc5/Kif2c/Tacc3/Cit/Kif11/Cdc25b/Spag5/Bub1/Sgo1/Ncapg2/Cdca8/Kif18b/Cdca5/Fancd2/Ndc80/Rad51ap1/Nusap1/Tpx2/Ncapg/Cdc6/Knstrn/Ube2c/Ncapd2/Phf13/Ccnb2/Aurkb/Mki67/Kif14/Aspm/Top2a/Ttk/Espl1/Cenpe/Fbxo5/Nuf2/Cdca2/Kntc1/Nsl1/Rad51/Rad54l/Bub1b/Psrc1/Mad2l1/Kifc1/Mastl/Nek2/Ccne1/Wrap73/Brip1/Ripor2/Ccnb1/Inf2/Plk1/Kif22/Zwilch/Ccne2/Fignl1/Aurka/Haspin/Chek2/Eme1/Trip13/Cdc20…	69
GO:0098813	nuclear chromosome segregation	54/410	188/8008	8.41168e-27	3.78526e-24	3.34143e-24	Racgap1/Ncaph/Birc5/Kif2c/Tacc3/Cit/Spag5/Bub1/Sgo1/Ncapg2/Cdca8/Kif18b/Cdca5/Fancd2/Ndc80/Nusap1/Ncapg/Cdc6/Knstrn/Ube2c/Ncapd2/Phf13/Aurkb/Kif14/Top2a/Knl1/Ttk/Espl1/Esco2/Cenpe/Cenpf/Fbxo5/Nuf2/Kntc1/Nsl1/Bub1b/Psrc1/Mad2l1/Nek2/Ccne1/Wrap73/Brip1/Ccnb1/Plk1/Kif22/Ect2/Zwilch/Ccne2/Haspin/Eme1/Trip13/Cdc20/Cenps/Recql4	54
GO:0051301	cell division	79/410	413/8008	5.18993e-26	2.07597e-23	1.83256e-23	Racgap1/Ncaph/Birc5/Rab11fip4/Kif2c/Cenpa/Tacc3/Cit/Ska1/Kif11/Cdc25b/E2f8/Spag5/Bub1/Sgo1/Ncapg2/Cdca8/Ccnf/Kif18b/Cdca5/Cdca3/Ndc80/Cdk1/Nusap1/Tpx2/Ccna2/Cdc6/Knstrn/Ube2c/Ncapd2/Sapcd2/Phf13/Ccnb2/Cep55/Aurkb/Lef1/Kif14/Aspm/Top2a/Knl1/Oip5/Cenpe/Fbxo5/Cks1b/Timeless/Nuf2/Stmn1/Spc24/Myb/Cdca2/Kntc1/Nsl1/Spc25/Mis18bp1/Bub1b/Psrc1/Mad2l1/Gpsm2/Ckap2/Mastl/Nek2/Ccne1/Brip1/Cenpv/Kif20a/Cdc25c/…	79
GO:0000819	sister chromatid segregation	45/410	151/8008	3.60748e-23	1.24226e-20	1.0966e-20	Racgap1/Ncaph/Birc5/Kif2c/Tacc3/Cit/Spag5/Bub1/Sgo1/Ncapg2/Cdca8/Kif18b/Cdca5/Ndc80/Nusap1/Ncapg/Cdc6/Knstrn/Ube2c/Ncapd2/Phf13/Aurkb/Kif14/Top2a/Ttk/Espl1/Esco2/Cenpe/Fbxo5/Nuf2/Kntc1/Nsl1/Bub1b/Psrc1/Mad2l1/Nek2/Wrap73/Ccnb1/Plk1/Kif22/Zwilch/Haspin/Trip13/Cdc20/Recql4	45
GO:0140014	mitotic nuclear division	52/410	204/8008	3.79578e-23	1.24226e-20	1.0966e-20	Cd28/Racgap1/Ncaph/Birc5/Kif2c/Tacc3/Cit/Kif11/Spag5/Bub1/Sgo1/Ncapg2/Cdca8/Kif18b/Cdca5/Ndc80/Nusap1/Tpx2/Ncapg/Cdc6/Knstrn/Ube2c/Ncapd2/Phf13/Aurkb/Mki67/Kif14/Ttk/Espl1/Cenpe/Fbxo5/Nuf2/Cdca2/Kntc1/Nsl1/Bub1b/Psrc1/Mad2l1/Kifc1/Nek2/Wrap73/Ripor2/Ccnb1/Plk1/Kif22/Zwilch/Aurka/Haspin/Chek2/Trip13/Cdc20/Chek1	52
GO:0000070	mitotic sister chromatid segregation	42/410	134/8008	1.24533e-22	3.73598e-20	3.29793e-20	Racgap1/Ncaph/Birc5/Kif2c/Tacc3/Cit/Spag5/Bub1/Sgo1/Ncapg2/Cdca8/Kif18b/Cdca5/Ndc80/Nusap1/Ncapg/Cdc6/Knstrn/Ube2c/Ncapd2/Phf13/Aurkb/Kif14/Ttk/Espl1/Cenpe/Fbxo5/Nuf2/Kntc1/Nsl1/Bub1b/Psrc1/Mad2l1/Nek2/Wrap73/Ccnb1/Plk1/Kif22/Zwilch/Haspin/Trip13/Cdc20	42
GO:0051726	regulation of cell cycle	91/410	643/8008	3.07707e-20	8.52112e-18	7.522e-18	Slfn1/Cd28/Zc3h12d/Racgap1/Birc5/Rab11fip4/Gmnn/Ttll12/Dlgap5/E2f2/Tacc3/Cit/Kif11/Cdc25b/E2f8/Spag5/Lmnb1/Bub1/Ccnf/Cdca5/Fancd2/Ndc80/Rad51ap1/Cdk1/Nusap1/Tpx2/Ccna2/Cdc6/Dbf4/Knstrn/Ube2c/Foxm1/Cdkn2c/Ticrr/Ccnb2/Pclaf/Dtl/Aurkb/Mki67/Lef1/Kif14/Aspm/Il10/Ttk/Stil/Cenpe/Cenpf/Rnaseh2b/Prkcq/Clspn/Fbxo5/Cks1b/Prr11/Timeless/Madd/Brca1/Cdca2/Prkca/Kntc1/Bub1b/Psrc1/Mad2l1/Gpsm2/Kifc1/Mastl/Nek2/…	91
GO:0010564	regulation of cell cycle process	69/410	421/8008	9.07502e-19	2.33358e-16	2.05996e-16	Slfn1/Cd28/Zc3h12d/Racgap1/Birc5/Rab11fip4/Tacc3/Cit/Kif11/Cdc25b/E2f8/Spag5/Lmnb1/Bub1/Ccnf/Cdca5/Fancd2/Ndc80/Rad51ap1/Cdk1/Nusap1/Tpx2/Cdc6/Dbf4/Knstrn/Ube2c/Ticrr/Dtl/Aurkb/Mki67/Lef1/Kif14/Ttk/Stil/Cenpe/Cenpf/Rnaseh2b/Prkcq/Clspn/Fbxo5/Timeless/Brca1/Cdca2/Kntc1/Bub1b/Psrc1/Mad2l1/Gpsm2/Kifc1/Nek2/Cenpv/Kif20a/Cdc25c/Ripor2/Ccnb1/E2f1/Plk1/Ect2/Zwilch/Wdr62/Aurka/Haspin/Chek2/Eme1/Trip13/Cd…	69
GO:1903046	meiotic cell cycle process	31/410	103/8008	2.10677e-16	5.05625e-14	4.46339e-14	Ncaph/Cdc25b/Bub1/Sgo1/Fancd2/Ndc80/Rad51ap1/Ncapd2/Ccnb2/Aspm/Top2a/Ttk/Espl1/Cenpe/Fbxo5/Nuf2/Rad51/Rad54l/Bub1b/Mastl/Ccne1/Brip1/Cdc25c/Plk1/Ccne2/Fignl1/Aurka/Eme1/Trip13/Cdc20/Cenps	31
GO:0140013	meiotic nuclear division	29/410	90/8008	2.60424e-16	5.85954e-14	5.1725e-14	Ncaph/Cdc25b/Bub1/Sgo1/Fancd2/Ndc80/Rad51ap1/Ccnb2/Aspm/Top2a/Ttk/Espl1/Cenpe/Fbxo5/Nuf2/Rad51/Rad54l/Bub1b/Mastl/Ccne1/Brip1/Plk1/Ccne2/Fignl1/Aurka/Eme1/Trip13/Cdc20/Cenps	29
GO:0044770	cell cycle phase transition	57/410	345/8008	9.7764e-16	2.0703e-13	1.82755e-13	Slfn1/Zc3h12d/Birc5/Tacc3/Cit/Cdc25b/Lmnb1/Bub1/Ccnf/Cdca5/Fancd2/Ndc80/Cdk1/Ccna2/Cdc6/Dbf4/Ube2c/Foxm1/Cdkn2c/Ticrr/Ccnb2/Dtl/Aurkb/Kif14/Ttk/Stil/Cenpe/Cenpf/Rnaseh2b/Prkcq/Clspn/Fbxo5/Cks1b/Timeless/Myb/Brca1/Kntc1/Bub1b/Mad2l1/Tcf19/Pole/Mastl/Ccne1/Cdc25c/Ccnb1/E2f1/Plk1/Zwilch/Ccne2/Aurka/Abcb1b/Haspin/Chek2/Eme1/Trip13/Orc1/Chek1	57
GO:0044772	mitotic cell cycle phase transition	52/410	294/8008	1.1016e-15	2.20319e-13	1.94486e-13	Slfn1/Zc3h12d/Birc5/Tacc3/Cit/Cdc25b/Lmnb1/Bub1/Ccnf/Cdca5/Ndc80/Cdk1/Ccna2/Cdc6/Dbf4/Ube2c/Foxm1/Cdkn2c/Ticrr/Ccnb2/Dtl/Aurkb/Kif14/Ttk/Cenpe/Cenpf/Rnaseh2b/Prkcq/Clspn/Fbxo5/Cks1b/Myb/Brca1/Kntc1/Bub1b/Mad2l1/Tcf19/Pole/Mastl/Ccne1/Cdc25c/Ccnb1/E2f1/Plk1/Zwilch/Ccne2/Abcb1b/Haspin/Chek2/Trip13/Orc1/Chek1	52
GO:0051321	meiotic cell cycle	35/410	140/8008	1.39619e-15	2.64541e-13	2.33523e-13	Ncaph/Cdc25b/Bub1/Sgo1/Fancd2/Ndc80/Rad51ap1/Ncapd2/Ccnb2/Mki67/Aspm/Top2a/Ttk/Espl1/Cenpe/Fbxo5/Nuf2/Rad51/Rad54l/Bub1b/Mastl/Nek2/Ccne1/Brip1/Cdc25c/Plk1/Ccne2/Exo1/Fignl1/Aurka/Pdik1l/Eme1/Trip13/Cdc20/Cenps	35
GO:1902850	microtubule cytoskeleton organization involved in mitosis	30/410	118/8008	9.97778e-14	1.796e-11	1.58542e-11	Racgap1/Dlgap5/Cenpa/Tacc3/Kif11/Cenph/Ndc80/Nusap1/Tpx2/Kif4/Sapcd2/Aurkb/Stil/Cenpe/Nuf2/Stmn1/Spc25/Psrc1/Mad2l1/Gpsm2/Kifc1/Nek2/Wrap73/Ripor2/Ccnb1/Plk1/Wdr62/Aurka/Chek2/Cdc20	30
GO:0007051	spindle organization	33/410	149/8008	3.93036e-13	6.73775e-11	5.94774e-11	Racgap1/Dlgap5/Tacc3/Kif11/Spag5/Cenph/Ndc80/Tpx2/Knstrn/Kif4/Ccnb2/Aurkb/Aspm/Espl1/Stil/Cenpe/Fbxo5/Nuf2/Stmn1/Spc25/Psrc1/Gpsm2/Kifc1/Nek2/Wrap73/Ripor2/Ccnb1/Aunip/Plk1/Wdr62/Aurka/Chek2/Cdc20	33
GO:0007346	regulation of mitotic cell cycle	49/410	308/8008	5.47461e-13	8.95845e-11	7.90806e-11	Slfn1/Cd28/Zc3h12d/Birc5/Ttll12/Dlgap5/Cdc25b/Lmnb1/Bub1/Cdca5/Fancd2/Ndc80/Cdk1/Nusap1/Cdc6/Dbf4/Ube2c/Ticrr/Dtl/Aurkb/Mki67/Kif14/Ttk/Stil/Cenpe/Cenpf/Rnaseh2b/Prkcq/Clspn/Fbxo5/Cks1b/Brca1/Cdca2/Prkca/Kntc1/Bub1b/Mad2l1/Lgmn/Cdc25c/Ccnb1/E2f1/Plk1/Zwilch/Haspin/Chek2/Eme1/Trip13/Orc1/Chek1	49
GO:0045787	positive regulation of cell cycle	38/410	199/8008	8.73138e-13	1.36665e-10	1.20641e-10	Cd28/Racgap1/Birc5/Rab11fip4/Cit/Cdc25b/E2f8/Spag5/Lmnb1/Cdca5/Ndc80/Rad51ap1/Cdk1/Nusap1/Cdc6/Dbf4/Ube2c/Dtl/Aurkb/Lef1/Kif14/Il10/Stil/Cenpe/Fbxo5/Prkca/Psrc1/Mad2l1/Gpsm2/Lgmn/Cenpv/Cdc25c/Ccnb1/Ect2/Aurka/Chek2/Orc1/Chek1	38
GO:0090068	positive regulation of cell cycle process	32/410	146/8008	1.2285e-12	1.84275e-10	1.62668e-10	Cd28/Racgap1/Birc5/Rab11fip4/Cit/Cdc25b/E2f8/Spag5/Lmnb1/Cdca5/Ndc80/Rad51ap1/Cdk1/Nusap1/Cdc6/Dbf4/Ube2c/Dtl/Aurkb/Lef1/Kif14/Cenpe/Fbxo5/Mad2l1/Gpsm2/Cenpv/Cdc25c/Ccnb1/Ect2/Aurka/Chek2/Orc1	32
GO:0051304	chromosome separation	23/410	76/8008	1.54925e-12	2.23092e-10	1.96935e-10	Ncaph/Birc5/Tacc3/Cit/Bub1/Ndc80/Cdc6/Ube2c/Aurkb/Top2a/Ttk/Espl1/Cenpe/Fbxo5/Kntc1/Bub1b/Mad2l1/Ccnb1/Plk1/Zwilch/Eme1/Trip13/Cenps	23
GO:0010948	negative regulation of cell cycle process	38/410	203/8008	1.66779e-12	2.30924e-10	2.03848e-10	Slfn1/Zc3h12d/Birc5/E2f8/Bub1/Ccnf/Fancd2/Ndc80/Cdk1/Cdc6/Ticrr/Dtl/Aurkb/Ttk/Stil/Cenpe/Rnaseh2b/Clspn/Fbxo5/Timeless/Brca1/Kntc1/Bub1b/Mad2l1/Kifc1/Nek2/Ccnb1/E2f1/Plk1/Zwilch/Aurka/Haspin/Chek2/Eme1/Trip13/Orc1/Chek1/Recql4	38
GO:0061982	meiosis I cell cycle process	21/410	63/8008	1.78752e-12	2.38336e-10	2.10391e-10	Cdc25b/Sgo1/Fancd2/Ndc80/Rad51ap1/Ccnb2/Top2a/Espl1/Cenpe/Fbxo5/Rad51/Rad54l/Ccne1/Brip1/Cdc25c/Plk1/Ccne2/Aurka/Eme1/Trip13/Cenps	21
GO:0007052	mitotic spindle organization	26/410	99/8008	2.06239e-12	2.65165e-10	2.34074e-10	Racgap1/Dlgap5/Tacc3/Kif11/Cenph/Ndc80/Tpx2/Kif4/Aurkb/Stil/Cenpe/Nuf2/Stmn1/Spc25/Psrc1/Gpsm2/Kifc1/Nek2/Wrap73/Ripor2/Ccnb1/Plk1/Wdr62/Aurka/Chek2/Cdc20	26
GO:0007127	meiosis I	20/410	59/8008	4.27368e-12	5.30526e-10	4.68321e-10	Cdc25b/Sgo1/Fancd2/Ndc80/Rad51ap1/Ccnb2/Top2a/Espl1/Cenpe/Fbxo5/Rad51/Rad54l/Ccne1/Brip1/Plk1/Ccne2/Aurka/Eme1/Trip13/Cenps	20
GO:0000226	microtubule cytoskeleton organization	51/410	348/8008	4.54844e-12	5.45813e-10	4.81816e-10	Racgap1/Birc5/Kif2c/Dlgap5/Cenpa/Tacc3/Ska1/Kif11/Spag5/Sgo1/Ccnf/Kif18b/Cenph/Ndc80/Nusap1/Tpx2/Knstrn/Kif4/Sapcd2/Ccnb2/Pclaf/Aurkb/Aspm/Espl1/Stil/Cenpe/Fbxo5/Nuf2/Stmn1/Brca1/Spc25/Psrc1/Mad2l1/Gpsm2/Kifc1/Ckap2/Nek2/Wrap73/Kif20a/Ripor2/Ccnb1/Aunip/Plk1/Wdr62/Trim46/Ska3/Aurka/Ska2/Chek2/Cdc20/Chek1	51
GO:0007017	microtubule-based process	60/410	461/8008	8.91048e-12	1.03477e-09	9.13438e-10	Bicdl1/Racgap1/Birc5/Kif2c/Dlgap5/Cenpa/Tacc3/Ska1/Kif11/Spag5/Sgo1/Kif15/Ccnf/Kif18b/Cenph/Ndc80/Nusap1/Tpx2/Knstrn/Kif4/Sapcd2/Ccnb2/Pclaf/Aurkb/Kif14/Aspm/Espl1/Stil/Cenpe/Fbxo5/Nuf2/Madd/Stmn1/Brca1/Borcs5/Spc25/Psrc1/Mad2l1/Gpsm2/Kifc1/Ckap2/Nek2/Wrap73/Ift27/Kif20a/Ripor2/Ccnb1/Aunip/Plk1/Kif22/Wdr62/Trim46/Ska3/Aurka/Ska2/Chek2/Ccr6/Cdc20/Sord/Chek1	60
GO:0044839	cell cycle G2/M phase transition	26/410	107/8008	1.42818e-11	1.6067e-09	1.41831e-09	Birc5/Cdc25b/Lmnb1/Ndc80/Cdk1/Ccna2/Cdc6/Foxm1/Ticrr/Ccnb2/Dtl/Kif14/Cenpf/Rnaseh2b/Prkcq/Clspn/Fbxo5/Brca1/Mastl/Cdc25c/Ccnb1/Plk1/Abcb1b/Chek2/Orc1/Chek1	26
GO:1901987	regulation of cell cycle phase transition	42/410	262/8008	2.2165e-11	2.418e-09	2.13449e-09	Slfn1/Zc3h12d/Birc5/Cdc25b/Lmnb1/Bub1/Cdca5/Fancd2/Ndc80/Cdk1/Cdc6/Dbf4/Ube2c/Ticrr/Dtl/Aurkb/Kif14/Ttk/Stil/Cenpe/Cenpf/Rnaseh2b/Prkcq/Clspn/Fbxo5/Timeless/Brca1/Kntc1/Bub1b/Mad2l1/Cdc25c/Ccnb1/E2f1/Plk1/Zwilch/Aurka/Haspin/Chek2/Eme1/Trip13/Orc1/Chek1	42
GO:0051983	regulation of chromosome segregation	21/410	71/8008	2.42002e-11	2.56238e-09	2.26194e-09	Birc5/Kif2c/Tacc3/Cit/Bub1/Ndc80/Cdc6/Ube2c/Aurkb/Mki67/Ttk/Cenpe/Fbxo5/Cdca2/Kntc1/Bub1b/Mad2l1/Ccnb1/Plk1/Zwilch/Trip13	21
GO:0007091	metaphase/anaphase transition of mitotic cell cycle	18/410	52/8008	3.45314e-11	3.5518e-09	3.13535e-09	Birc5/Tacc3/Cit/Bub1/Ndc80/Cdc6/Ube2c/Aurkb/Ttk/Cenpe/Fbxo5/Kntc1/Bub1b/Mad2l1/Ccnb1/Plk1/Zwilch/Trip13	18
GO:0010965	regulation of mitotic sister chromatid separation	18/410	53/8008	4.98624e-11	4.85147e-09	4.28263e-09	Birc5/Tacc3/Cit/Bub1/Ndc80/Cdc6/Ube2c/Aurkb/Ttk/Cenpe/Fbxo5/Kntc1/Bub1b/Mad2l1/Ccnb1/Plk1/Zwilch/Trip13	18
GO:0044784	metaphase/anaphase transition of cell cycle	18/410	53/8008	4.98624e-11	4.85147e-09	4.28263e-09	Birc5/Tacc3/Cit/Bub1/Ndc80/Cdc6/Ube2c/Aurkb/Ttk/Cenpe/Fbxo5/Kntc1/Bub1b/Mad2l1/Ccnb1/Plk1/Zwilch/Trip13	18
GO:1901988	negative regulation of cell cycle phase transition	33/410	178/8008	6.85875e-11	6.49776e-09	5.73589e-09	Slfn1/Zc3h12d/Birc5/Bub1/Fancd2/Ndc80/Cdk1/Cdc6/Ticrr/Dtl/Aurkb/Ttk/Stil/Cenpe/Rnaseh2b/Clspn/Fbxo5/Timeless/Brca1/Kntc1/Bub1b/Mad2l1/Ccnb1/E2f1/Plk1/Zwilch/Aurka/Haspin/Chek2/Eme1/Trip13/Orc1/Chek1	33
GO:0045786	negative regulation of cell cycle	40/410	250/8008	7.30052e-11	6.66059e-09	5.87963e-09	Slfn1/Zc3h12d/Birc5/Gmnn/E2f8/Bub1/Ccnf/Fancd2/Ndc80/Cdk1/Cdc6/Cdkn2c/Ticrr/Dtl/Aurkb/Ttk/Stil/Cenpe/Rnaseh2b/Clspn/Fbxo5/Timeless/Brca1/Kntc1/Bub1b/Mad2l1/Kifc1/Nek2/Ccnb1/E2f1/Plk1/Zwilch/Aurka/Haspin/Chek2/Eme1/Trip13/Orc1/Chek1/Recql4	40
GO:0000086	G2/M transition of mitotic cell cycle	24/410	98/8008	7.4462e-11	6.66059e-09	5.87963e-09	Birc5/Cdc25b/Lmnb1/Cdk1/Ccna2/Cdc6/Foxm1/Ticrr/Dtl/Kif14/Cenpf/Rnaseh2b/Prkcq/Clspn/Fbxo5/Brca1/Mastl/Cdc25c/Ccnb1/Plk1/Abcb1b/Chek2/Orc1/Chek1	24
GO:0000075	cell cycle checkpoint signaling	29/410	141/8008	7.58568e-11	6.66059e-09	5.87963e-09	Birc5/Bub1/Fancd2/Ndc80/Cdk1/Cdc6/Ticrr/Dtl/Aurkb/Ttk/Stil/Cenpe/Rnaseh2b/Clspn/Timeless/Brca1/Kntc1/Bub1b/Mad2l1/Ccnb1/E2f1/Plk1/Zwilch/Aurka/Chek2/Eme1/Trip13/Orc1/Chek1	29
GO:0007143	female meiotic nuclear division	12/410	22/8008	1.12379e-10	9.63251e-09	8.50309e-09	Ncaph/Cdc25b/Ndc80/Ccnb2/Top2a/Ttk/Cenpe/Fbxo5/Mastl/Plk1/Aurka/Trip13	12
GO:0007093	mitotic cell cycle checkpoint signaling	25/410	109/8008	1.37032e-10	1.13652e-08	1.00326e-08	Birc5/Bub1/Fancd2/Ndc80/Cdk1/Cdc6/Ticrr/Dtl/Aurkb/Ttk/Stil/Cenpe/Clspn/Brca1/Kntc1/Bub1b/Mad2l1/Ccnb1/Plk1/Zwilch/Chek2/Eme1/Trip13/Orc1/Chek1	25
GO:1901990	regulation of mitotic cell cycle phase transition	36/410	213/8008	1.41584e-10	1.13652e-08	1.00326e-08	Slfn1/Zc3h12d/Birc5/Cdc25b/Lmnb1/Bub1/Cdca5/Ndc80/Cdk1/Cdc6/Dbf4/Ube2c/Ticrr/Dtl/Aurkb/Kif14/Ttk/Cenpe/Cenpf/Rnaseh2b/Prkcq/Clspn/Fbxo5/Brca1/Kntc1/Bub1b/Mad2l1/Cdc25c/Ccnb1/E2f1/Plk1/Zwilch/Haspin/Trip13/Orc1/Chek1	36
GO:0051306	mitotic sister chromatid separation	18/410	56/8008	1.42065e-10	1.13652e-08	1.00326e-08	Birc5/Tacc3/Cit/Bub1/Ndc80/Cdc6/Ube2c/Aurkb/Ttk/Cenpe/Fbxo5/Kntc1/Bub1b/Mad2l1/Ccnb1/Plk1/Zwilch/Trip13	18
GO:0031577	spindle checkpoint signaling	15/410	38/8008	1.77075e-10	1.3858e-08	1.22332e-08	Birc5/Bub1/Ndc80/Aurkb/Ttk/Stil/Cenpe/Kntc1/Bub1b/Mad2l1/Ccnb1/Plk1/Zwilch/Aurka/Trip13	15
GO:0033045	regulation of sister chromatid segregation	18/410	57/8008	1.97994e-10	1.48495e-08	1.31084e-08	Birc5/Tacc3/Cit/Bub1/Ndc80/Cdc6/Ube2c/Aurkb/Ttk/Cenpe/Fbxo5/Kntc1/Bub1b/Mad2l1/Ccnb1/Plk1/Zwilch/Trip13	18
GO:1905818	regulation of chromosome separation	18/410	57/8008	1.97994e-10	1.48495e-08	1.31084e-08	Birc5/Tacc3/Cit/Bub1/Ndc80/Cdc6/Ube2c/Aurkb/Ttk/Cenpe/Fbxo5/Kntc1/Bub1b/Mad2l1/Ccnb1/Plk1/Zwilch/Trip13	18
GO:0045839	negative regulation of mitotic nuclear division	15/410	39/8008	2.74442e-10	2.01631e-08	1.77989e-08	Birc5/Bub1/Ndc80/Aurkb/Ttk/Cenpe/Fbxo5/Kntc1/Bub1b/Mad2l1/Ccnb1/Plk1/Zwilch/Trip13/Chek1	15
GO:0051783	regulation of nuclear division	21/410	81/8008	3.74503e-10	2.69642e-08	2.38026e-08	Cd28/Birc5/Bub1/Ndc80/Rad51ap1/Nusap1/Aurkb/Mki67/Ttk/Cenpe/Fbxo5/Cdca2/Kntc1/Bub1b/Mad2l1/Ccnb1/Plk1/Zwilch/Trip13/Cdc20/Chek1	21
GO:0045132	meiotic chromosome segregation	16/410	46/8008	4.01571e-10	2.83462e-08	2.50226e-08	Ncaph/Bub1/Sgo1/Fancd2/Top2a/Ttk/Espl1/Nuf2/Bub1b/Ccne1/Brip1/Plk1/Ccne2/Eme1/Trip13/Cenps	16
GO:0045841	negative regulation of mitotic metaphase/anaphase transition	14/410	35/8008	5.90658e-10	4.01202e-08	3.5416e-08	Birc5/Bub1/Ndc80/Aurkb/Ttk/Cenpe/Fbxo5/Kntc1/Bub1b/Mad2l1/Ccnb1/Plk1/Zwilch/Trip13	14
GO:0071174	mitotic spindle checkpoint signaling	14/410	35/8008	5.90658e-10	4.01202e-08	3.5416e-08	Birc5/Bub1/Ndc80/Aurkb/Ttk/Stil/Cenpe/Kntc1/Bub1b/Mad2l1/Ccnb1/Plk1/Zwilch/Trip13	14
GO:0033046	negative regulation of sister chromatid segregation	14/410	36/8008	9.2195e-10	5.80059e-08	5.12047e-08	Birc5/Bub1/Ndc80/Aurkb/Ttk/Cenpe/Fbxo5/Kntc1/Bub1b/Mad2l1/Ccnb1/Plk1/Zwilch/Trip13	14
GO:0033048	negative regulation of mitotic sister chromatid segregation	14/410	36/8008	9.2195e-10	5.80059e-08	5.12047e-08	Birc5/Bub1/Ndc80/Aurkb/Ttk/Cenpe/Fbxo5/Kntc1/Bub1b/Mad2l1/Ccnb1/Plk1/Zwilch/Trip13	14
GO:1902100	negative regulation of metaphase/anaphase transition of cell cycle	14/410	36/8008	9.2195e-10	5.80059e-08	5.12047e-08	Birc5/Bub1/Ndc80/Aurkb/Ttk/Cenpe/Fbxo5/Kntc1/Bub1b/Mad2l1/Ccnb1/Plk1/Zwilch/Trip13	14
GO:2000816	negative regulation of mitotic sister chromatid separation	14/410	36/8008	9.2195e-10	5.80059e-08	5.12047e-08	Birc5/Bub1/Ndc80/Aurkb/Ttk/Cenpe/Fbxo5/Kntc1/Bub1b/Mad2l1/Ccnb1/Plk1/Zwilch/Trip13	14
GO:0051784	negative regulation of nuclear division	15/410	42/8008	9.3454e-10	5.80059e-08	5.12047e-08	Birc5/Bub1/Ndc80/Aurkb/Ttk/Cenpe/Fbxo5/Kntc1/Bub1b/Mad2l1/Ccnb1/Plk1/Zwilch/Trip13/Chek1	15
GO:0030071	regulation of mitotic metaphase/anaphase transition	16/410	49/8008	1.17625e-09	7.17713e-08	6.3356e-08	Birc5/Bub1/Ndc80/Cdc6/Ube2c/Aurkb/Ttk/Cenpe/Fbxo5/Kntc1/Bub1b/Mad2l1/Ccnb1/Plk1/Zwilch/Trip13	16
GO:0051276	chromosome organization	69/410	640/8008	1.20122e-09	7.20732e-08	6.36225e-08	Racgap1/Ncaph/Birc5/Kif2c/Dlgap5/Cenpa/Tacc3/Cit/Spag5/Bub1/Uhrf1/Sgo1/Ncapg2/Cdca8/Kif18b/Cdca5/Cenph/Fancd2/Ndc80/Cdk1/Nusap1/Ncapg/Cdc6/Knstrn/Ube2c/Ncapd2/Phf13/Aurkb/Mki67/Kif14/Top2a/Ttk/Oip5/Espl1/Esco2/Cenpe/Prkcq/Fbxo5/Nuf2/Myb/Pif1/Kntc1/Nsl1/Rad51/Rad54l/Mcm8/Bub1b/Psrc1/Mad2l1/Asf1b/Cenpi/Nek2/Ccne1/Wrap73/Brip1/Cenpv/Ccnb1/Plk1/Kif22/Zwilch/Zbtb48/Ccne2/Chaf1a/Cbx8/Haspin/Trip13/Cdc2…	69
GO:0008608	attachment of spindle microtubules to kinetochore	13/410	31/8008	1.22169e-09	7.20997e-08	6.36459e-08	Racgap1/Kif2c/Spag5/Sgo1/Ndc80/Knstrn/Aurkb/Knl1/Cenpe/Nuf2/Nek2/Ccnb1/Ect2	13
GO:1905819	negative regulation of chromosome separation	14/410	37/8008	1.41474e-09	8.21459e-08	7.25142e-08	Birc5/Bub1/Ndc80/Aurkb/Ttk/Cenpe/Fbxo5/Kntc1/Bub1b/Mad2l1/Ccnb1/Plk1/Zwilch/Trip13	14
GO:0007088	regulation of mitotic nuclear division	19/410	71/8008	1.46012e-09	8.34355e-08	7.36526e-08	Cd28/Birc5/Bub1/Ndc80/Nusap1/Aurkb/Mki67/Ttk/Cenpe/Fbxo5/Cdca2/Kntc1/Bub1b/Mad2l1/Ccnb1/Plk1/Zwilch/Trip13/Chek1	19
GO:1902099	regulation of metaphase/anaphase transition of cell cycle	16/410	50/8008	1.6497e-09	9.27955e-08	8.19151e-08	Birc5/Bub1/Ndc80/Cdc6/Ube2c/Aurkb/Ttk/Cenpe/Fbxo5/Kntc1/Bub1b/Mad2l1/Ccnb1/Plk1/Zwilch/Trip13	16
GO:0051985	negative regulation of chromosome segregation	14/410	38/8008	2.1367e-09	1.18341e-07	1.04465e-07	Birc5/Bub1/Ndc80/Aurkb/Ttk/Cenpe/Fbxo5/Kntc1/Bub1b/Mad2l1/Ccnb1/Plk1/Zwilch/Trip13	14
GO:0045930	negative regulation of mitotic cell cycle	29/410	162/8008	2.40209e-09	1.31023e-07	1.15661e-07	Slfn1/Zc3h12d/Birc5/Bub1/Fancd2/Ndc80/Cdk1/Cdc6/Ticrr/Dtl/Aurkb/Ttk/Stil/Cenpe/Clspn/Fbxo5/Brca1/Kntc1/Bub1b/Mad2l1/Ccnb1/Plk1/Zwilch/Haspin/Chek2/Eme1/Trip13/Orc1/Chek1	29
GO:0007094	mitotic spindle assembly checkpoint signaling	13/410	33/8008	3.08995e-09	1.63586e-07	1.44405e-07	Birc5/Bub1/Ndc80/Aurkb/Ttk/Cenpe/Kntc1/Bub1b/Mad2l1/Ccnb1/Plk1/Zwilch/Trip13	13
GO:0071173	spindle assembly checkpoint signaling	13/410	33/8008	3.08995e-09	1.63586e-07	1.44405e-07	Birc5/Bub1/Ndc80/Aurkb/Ttk/Cenpe/Kntc1/Bub1b/Mad2l1/Ccnb1/Plk1/Zwilch/Trip13	13
GO:0033047	regulation of mitotic sister chromatid segregation	14/410	39/8008	3.17957e-09	1.65891e-07	1.4644e-07	Birc5/Bub1/Ndc80/Aurkb/Ttk/Cenpe/Fbxo5/Kntc1/Bub1b/Mad2l1/Ccnb1/Plk1/Zwilch/Trip13	14
GO:1901991	negative regulation of mitotic cell cycle phase transition	25/410	129/8008	5.8597e-09	3.01356e-07	2.66022e-07	Slfn1/Zc3h12d/Birc5/Bub1/Ndc80/Cdk1/Cdc6/Ticrr/Dtl/Aurkb/Ttk/Cenpe/Clspn/Fbxo5/Brca1/Kntc1/Bub1b/Mad2l1/Ccnb1/Plk1/Zwilch/Haspin/Trip13/Orc1/Chek1	25
GO:0042110	T cell activation	44/410	337/8008	6.3408e-09	3.21505e-07	2.83808e-07	Cd4/Cd40lg/Slfn1/Cd5/Slamf1/Cd2/Themis/Cd3e/Cd28/Cd3d/Tnfrsf4/Zc3h12d/Lck/Slamf6/Adk/Tnfsf8/Cd6/Cd3g/Lat/P2rx7/Fancd2/Il6ra/Malt1/Lef1/Dpp4/F2rl1/Zbtb32/Ctla4/Prkcq/Sit1/Myb/Sh3rf1/Tigit/Btla/Ripor2/Lgals1/Ccr7/Lgals7/Il21/Hsh2d/Ccr6/Bcl2a1d/Lgals3/Cd80	44
GO:0008283	cell population proliferation	90/410	978/8008	9.04943e-09	4.52471e-07	3.99419e-07	Cd4/Cd40lg/Slfn1/Slamf1/Cd3e/Cd28/Tnfrsf4/Zc3h12d/St8sia1/Slamf6/Adk/Racgap1/Cd6/Birc5/Tacc3/E2f8/P2rx7/Uhrf1/Rrm2/Ncapg2/Ndrg2/Cdk1/Ndrg1/Il6ra/Ccna2/Sdcbp2/Cdc6/Foxm1/Cdkn2c/Sapcd2/Mki67/Malt1/Lef1/Kif14/Aspm/Dpp4/S1pr1/F2rl1/Il10/Zbtb32/Ctla4/Pde4d/Rnaseh2b/Prkcq/Tesc/Fbxo5/Cks1b/Fasl/Shcbp1/Prkca/Traf5/Sh3rf1/Cdca7/Cip2a/Tnfrsf13b/Tcf19/Prdx4/Btla/Ccne1/Lgmn/Brip1/Ext1/Ripor2/Melk/Ccnb1/Scarb…	90
GO:0007292	female gamete generation	17/410	63/8008	9.44459e-09	4.6576e-07	4.11149e-07	Ncaph/Cdc25b/Ndc80/Ccnb2/Aspm/Top2a/Ttk/Cenpe/Fbxo5/Mcm8/Mastl/Ccnb1/Paqr7/Hexb/Plk1/Aurka/Trip13	17
GO:0010389	regulation of G2/M transition of mitotic cell cycle	18/410	74/8008	2.06709e-08	1.00561e-06	8.87703e-07	Cdc25b/Lmnb1/Cdk1/Cdc6/Ticrr/Dtl/Kif14/Cenpf/Rnaseh2b/Prkcq/Clspn/Fbxo5/Brca1/Cdc25c/Ccnb1/Plk1/Orc1/Chek1	18
GO:0006260	DNA replication	30/410	195/8008	4.85245e-08	2.29853e-06	2.02902e-06	Gmnn/E2f8/Rrm2/Cdk1/Ccna2/Cdc6/Dbf4/Ticrr/Pclaf/Dtl/Pola1/Esco2/Fbxo5/Timeless/Pif1/Rad51/Mcm8/Pole/Gins2/Gins3/Ccne1/Gins1/Pole2/Mcm10/Ccne2/Chaf1a/Eme1/Orc1/Cenps/Recql4	30
GO:1902749	regulation of cell cycle G2/M phase transition	18/410	79/8008	6.17584e-08	2.88741e-06	2.54885e-06	Cdc25b/Lmnb1/Cdk1/Cdc6/Ticrr/Dtl/Kif14/Cenpf/Rnaseh2b/Prkcq/Clspn/Fbxo5/Brca1/Cdc25c/Ccnb1/Plk1/Orc1/Chek1	18
GO:0098609	cell-cell adhesion	43/410	355/8008	8.875e-08	4.09615e-06	3.61587e-06	Cd4/Cd40lg/Slfn1/Cd5/Slamf1/Cd2/Cd3e/Cd28/Zc3h12d/Lck/Adk/Cd6/Il6ra/Malt1/Lef1/Dpp4/Il10/Celsr1/Ctla4/Pde4d/Prkcq/Itga6/Myb/Prkca/Ass1/Tigit/Btla/Pkp3/Zdhhc2/Ext1/Ripor2/Lgals1/Nt5e/Ccr7/Lgals7/Il21/Chst2/Slc39a8/Pvr/Sell/Cd200/Lgals3/Cd80	43
GO:0051988	regulation of attachment of spindle microtubules to kinetochore	8/410	14/8008	1.01015e-07	4.60322e-06	4.06349e-06	Racgap1/Spag5/Knstrn/Aurkb/Cenpe/Nek2/Ccnb1/Ect2	8
GO:0007159	leukocyte cell-cell adhesion	32/410	224/8008	1.02979e-07	4.63404e-06	4.09069e-06	Cd4/Cd40lg/Slfn1/Cd5/Slamf1/Cd3e/Cd28/Zc3h12d/Lck/Adk/Cd6/Malt1/Lef1/Dpp4/Ctla4/Prkcq/Myb/Ass1/Tigit/Btla/Ext1/Ripor2/Lgals1/Nt5e/Ccr7/Lgals7/Il21/Chst2/Slc39a8/Sell/Lgals3/Cd80	32
GO:0070661	leukocyte proliferation	30/410	202/8008	1.09143e-07	4.81973e-06	4.25461e-06	Cd4/Cd40lg/Slfn1/Slamf1/Cd3e/Cd28/Tnfrsf4/Zc3h12d/Slamf6/Adk/Cd6/P2rx7/Malt1/Lef1/F2rl1/Il10/Zbtb32/Ctla4/Prkcq/Sh3rf1/Tnfrsf13b/Btla/Ripor2/Ccr7/Lgals7/Il21/St6gal1/Lgals3/Csf1/Cd80	30
GO:0032943	mononuclear cell proliferation	29/410	191/8008	1.09783e-07	4.81973e-06	4.25461e-06	Cd4/Cd40lg/Slfn1/Slamf1/Cd3e/Cd28/Tnfrsf4/Zc3h12d/Slamf6/Adk/Cd6/P2rx7/Malt1/Lef1/Il10/Zbtb32/Ctla4/Prkcq/Sh3rf1/Tnfrsf13b/Btla/Ripor2/Ccr7/Lgals7/Il21/St6gal1/Lgals3/Csf1/Cd80	29
GO:0000003	reproduction	58/410	558/8008	1.13925e-07	4.8825e-06	4.31002e-06	Izumo1r/Racgap1/Ncaph/Cit/Cdc25b/E2f8/Bub1/Sgo1/Ccnf/Fancd2/Ndc80/Rad51ap1/Ncapd2/Ccnb2/Mki67/Lef1/Gnpda1/Aspm/Top2a/Il10/Ttk/Espl1/Cenpe/Tesc/Fbxo5/Nuf2/Cip2a/Rad51/Rad54l/Mcm8/Bub1b/Prdx4/Mastl/Nek2/Ccne1/Ift27/Brip1/Cdc25c/Ccnb1/Paqr7/Hexb/Plk1/Akr1c18/Ccne2/Exo1/Fignl1/Aurka/Ggt7/Pdik1l/Eme1/Ccr6/Trip13/Cdc20/Sord/Cenps/Cyp11a1/Csf1/Mmp9	58
GO:0022414	reproductive process	58/410	558/8008	1.13925e-07	4.8825e-06	4.31002e-06	Izumo1r/Racgap1/Ncaph/Cit/Cdc25b/E2f8/Bub1/Sgo1/Ccnf/Fancd2/Ndc80/Rad51ap1/Ncapd2/Ccnb2/Mki67/Lef1/Gnpda1/Aspm/Top2a/Il10/Ttk/Espl1/Cenpe/Tesc/Fbxo5/Nuf2/Cip2a/Rad51/Rad54l/Mcm8/Bub1b/Prdx4/Mastl/Nek2/Ccne1/Ift27/Brip1/Cdc25c/Ccnb1/Paqr7/Hexb/Plk1/Akr1c18/Ccne2/Exo1/Fignl1/Aurka/Ggt7/Pdik1l/Eme1/Ccr6/Trip13/Cdc20/Sord/Cenps/Cyp11a1/Csf1/Mmp9	58
GO:0007155	cell adhesion	56/410	531/8008	1.18699e-07	5.02724e-06	4.43779e-06	Cd4/Cd40lg/Slfn1/Cd5/Slamf1/Cd2/Cd3e/Cd28/Zc3h12d/Lck/Izumo1r/Adk/Cd6/Aplp1/Il6ra/Malt1/Lef1/Kif14/Dpp4/S1pr1/Il10/Celsr1/Ctla4/Pde4d/Prkcq/Tesc/Itga6/Myb/Prkca/Ass1/Acp5/Gpm6b/Tigit/Btla/Actn1/Pkp3/Zdhhc2/Ext1/Ripor2/Lgals1/Nt5e/Ccr7/Lgals7/Il21/Chst2/Sdc3/Slc39a8/Cxcr3/Pvr/Troap/Sell/St6gal1/Cd200/Lgals3/Csf1/Cd80	56
GO:0033044	regulation of chromosome organization	25/410	151/8008	1.54668e-07	6.47448e-06	5.71534e-06	Birc5/Tacc3/Cit/Bub1/Cdca5/Ndc80/Cdc6/Ube2c/Aurkb/Top2a/Ttk/Cenpe/Prkcq/Fbxo5/Pif1/Kntc1/Bub1b/Mad2l1/Nek2/Cenpv/Ccnb1/Plk1/Zwilch/Trip13/Recql4	25
GO:2001251	negative regulation of chromosome organization	17/410	75/8008	1.56603e-07	6.48011e-06	5.72031e-06	Birc5/Bub1/Ndc80/Aurkb/Top2a/Ttk/Cenpe/Fbxo5/Pif1/Kntc1/Bub1b/Mad2l1/Ccnb1/Plk1/Zwilch/Trip13/Recql4	17
GO:0071459	protein localization to chromosome, centromeric region	10/410	25/8008	1.81508e-07	7.42534e-06	6.55471e-06	Cenpa/Ndc80/Cdk1/Aurkb/Knl1/Ttk/Kntc1/Bub1b/Zwilch/Haspin	10
GO:0051225	spindle assembly	19/410	96/8008	2.88218e-07	1.16583e-05	1.02913e-05	Racgap1/Kif11/Spag5/Ndc80/Tpx2/Ccnb2/Aurkb/Aspm/Cenpe/Fbxo5/Gpsm2/Kifc1/Nek2/Wrap73/Ripor2/Plk1/Aurka/Chek2/Cdc20	19
GO:0008284	positive regulation of cell population proliferation	49/410	450/8008	3.05261e-07	1.22105e-05	1.07788e-05	Cd4/Cd40lg/Slamf1/Cd3e/Cd28/Tnfrsf4/St8sia1/Adk/Cd6/Rrm2/Cdk1/Il6ra/Ccna2/Cdc6/Foxm1/Sapcd2/Lef1/Kif14/Aspm/Dpp4/S1pr1/Il10/Pde4d/Rnaseh2b/Prkcq/Fbxo5/Fasl/Prkca/Traf5/Cip2a/Ccne1/Lgmn/Ccnb1/E2f1/Ccr7/Wdr62/Il21/Cbx8/Cxcr3/Cdc20/Tgfbr3/Orc1/Plac8/St6gal1/Recql4/Lgals3/Csf1/Mmp9/Cd80	49
GO:0050863	regulation of T cell activation	30/410	212/8008	3.23184e-07	1.27853e-05	1.12862e-05	Cd4/Cd40lg/Slfn1/Cd5/Slamf1/Cd3e/Cd28/Zc3h12d/Lck/Adk/Cd6/Lat/Fancd2/Malt1/Lef1/Dpp4/Ctla4/Prkcq/Sit1/Myb/Sh3rf1/Tigit/Btla/Ripor2/Lgals1/Ccr7/Lgals7/Il21/Lgals3/Cd80	30
GO:0032944	regulation of mononuclear cell proliferation	24/410	147/8008	3.59934e-07	1.40844e-05	1.2433e-05	Cd4/Cd40lg/Slfn1/Slamf1/Cd3e/Cd28/Tnfrsf4/Zc3h12d/Adk/Cd6/Il10/Ctla4/Prkcq/Sh3rf1/Tnfrsf13b/Btla/Ripor2/Ccr7/Lgals7/Il21/St6gal1/Lgals3/Csf1/Cd80	24
GO:0070192	chromosome organization involved in meiotic cell cycle	11/410	33/8008	3.86087e-07	1.49453e-05	1.3193e-05	Ncaph/Bub1/Sgo1/Fancd2/Ncapd2/Rad51/Bub1b/Ccne1/Brip1/Ccne2/Trip13	11
GO:0030261	chromosome condensation	10/410	27/8008	4.27015e-07	1.62407e-05	1.43365e-05	Ncaph/Ncapg2/Cdca5/Cdk1/Nusap1/Ncapg/Ncapd2/Phf13/Top2a/Ccnb1	10
GO:0022407	regulation of cell-cell adhesion	34/410	262/8008	4.28574e-07	1.62407e-05	1.43365e-05	Cd4/Cd40lg/Slfn1/Cd5/Slamf1/Cd3e/Cd28/Zc3h12d/Lck/Adk/Cd6/Il6ra/Malt1/Lef1/Dpp4/Il10/Ctla4/Pde4d/Prkcq/Itga6/Myb/Prkca/Ass1/Tigit/Btla/Zdhhc2/Ripor2/Lgals1/Ccr7/Lgals7/Il21/Chst2/Lgals3/Cd80	34
GO:0042098	T cell proliferation	23/410	142/8008	7.32372e-07	2.74639e-05	2.42438e-05	Cd4/Cd40lg/Slfn1/Slamf1/Cd3e/Cd28/Tnfrsf4/Zc3h12d/Adk/Cd6/P2rx7/Malt1/Zbtb32/Ctla4/Prkcq/Sh3rf1/Btla/Ripor2/Ccr7/Lgals7/Il21/Lgals3/Cd80	23
GO:0070663	regulation of leukocyte proliferation	24/410	153/8008	7.67074e-07	2.84687e-05	2.51307e-05	Cd4/Cd40lg/Slfn1/Slamf1/Cd3e/Cd28/Tnfrsf4/Zc3h12d/Adk/Cd6/Il10/Ctla4/Prkcq/Sh3rf1/Tnfrsf13b/Btla/Ripor2/Ccr7/Lgals7/Il21/St6gal1/Lgals3/Csf1/Cd80	24
GO:0007131	reciprocal meiotic recombination	9/410	23/8008	9.53273e-07	3.44431e-05	3.04046e-05	Fancd2/Rad51ap1/Top2a/Rad51/Rad54l/Brip1/Eme1/Trip13/Cenps	9
GO:0140527	reciprocal homologous recombination	9/410	23/8008	9.53273e-07	3.44431e-05	3.04046e-05	Fancd2/Rad51ap1/Top2a/Rad51/Rad54l/Brip1/Eme1/Trip13/Cenps	9
GO:0007010	cytoskeleton organization	65/410	696/8008	9.56753e-07	3.44431e-05	3.04046e-05	Racgap1/Birc5/Kif2c/Dlgap5/Cenpa/Tacc3/Cit/Ska1/Kif11/Spag5/P2rx7/Sgo1/Ccnf/Kif18b/Cenph/Ndc80/Nusap1/Tpx2/Knstrn/Kif4/Sapcd2/Ccnb2/Pclaf/Aurkb/Aspm/S1pr1/F2rl1/Espl1/Stil/Celsr1/Cenpe/Prkcq/Fbxo5/Nuf2/Stmn1/Brca1/Spc25/Psrc1/Mad2l1/Gpsm2/Kifc1/Ckap2/Diaph3/Nek2/Gpm6b/Rflnb/Arhgap10/Wrap73/Actn1/Kif20a/Ripor2/Ccnb1/Inf2/Ccr7/Aunip/Plk1/Ect2/Wdr62/Trim46/Ska3/Aurka/Ska2/Chek2/Cdc20/Chek1	65
GO:0046651	lymphocyte proliferation	27/410	189/8008	1.05582e-06	3.76332e-05	3.32206e-05	Cd4/Cd40lg/Slfn1/Slamf1/Cd3e/Cd28/Tnfrsf4/Zc3h12d/Slamf6/Adk/Cd6/P2rx7/Malt1/Lef1/Il10/Zbtb32/Ctla4/Prkcq/Sh3rf1/Tnfrsf13b/Btla/Ripor2/Ccr7/Lgals7/Il21/Lgals3/Cd80	27
GO:0035825	homologous recombination	9/410	24/8008	1.4568e-06	5.14163e-05	4.53877e-05	Fancd2/Rad51ap1/Top2a/Rad51/Rad54l/Brip1/Eme1/Trip13/Cenps	9
GO:1903037	regulation of leukocyte cell-cell adhesion	28/410	204/8008	1.51032e-06	5.27878e-05	4.65984e-05	Cd4/Cd40lg/Slfn1/Cd5/Slamf1/Cd3e/Cd28/Zc3h12d/Lck/Adk/Cd6/Malt1/Lef1/Dpp4/Ctla4/Prkcq/Myb/Ass1/Tigit/Btla/Ripor2/Lgals1/Ccr7/Lgals7/Il21/Chst2/Lgals3/Cd80	28
GO:0034501	protein localization to kinetochore	8/410	19/8008	2.02499e-06	6.94281e-05	6.12875e-05	Ndc80/Cdk1/Aurkb/Knl1/Ttk/Kntc1/Zwilch/Haspin	8
GO:1903083	protein localization to condensed chromosome	8/410	19/8008	2.02499e-06	6.94281e-05	6.12875e-05	Ndc80/Cdk1/Aurkb/Knl1/Ttk/Kntc1/Zwilch/Haspin	8
GO:0034508	centromere complex assembly	9/410	25/8008	2.17414e-06	7.38389e-05	6.51812e-05	Dlgap5/Cenpa/Cenph/Oip5/Cenpe/Kntc1/Cenpi/Cenpv/Cenps	9
GO:0051310	metaphase plate congression	13/410	54/8008	2.22751e-06	7.49442e-05	6.61569e-05	Kif2c/Spag5/Cdca8/Cdca5/Ndc80/Aurkb/Kif14/Cenpe/Cenpf/Nuf2/Psrc1/Ccnb1/Kif22	13
GO:0000910	cytokinesis	19/410	110/8008	2.54982e-06	8.4994e-05	7.50284e-05	Racgap1/Birc5/Rab11fip4/Cenpa/Cit/Cdc25b/E2f8/Nusap1/Cdc6/Cep55/Aurkb/Kif14/Stmn1/Ckap2/Cenpv/Kif20a/Plk1/Ect2/Aurka	19
GO:0051303	establishment of chromosome localization	14/410	64/8008	3.10637e-06	0.000102596	9.05662e-05	Birc5/Kif2c/Spag5/Cdca8/Cdca5/Ndc80/Aurkb/Kif14/Cenpe/Cenpf/Nuf2/Psrc1/Ccnb1/Kif22	14
GO:0042127	regulation of cell population proliferation	70/410	796/8008	3.15903e-06	0.000103386	9.12642e-05	Cd4/Cd40lg/Slfn1/Slamf1/Cd3e/Cd28/Tnfrsf4/Zc3h12d/St8sia1/Adk/Cd6/Birc5/Uhrf1/Rrm2/Ndrg2/Cdk1/Ndrg1/Il6ra/Ccna2/Cdc6/Foxm1/Cdkn2c/Sapcd2/Lef1/Kif14/Aspm/Dpp4/S1pr1/Il10/Ctla4/Pde4d/Rnaseh2b/Prkcq/Tesc/Fbxo5/Fasl/Shcbp1/Prkca/Traf5/Sh3rf1/Cdca7/Cip2a/Tnfrsf13b/Prdx4/Btla/Ccne1/Lgmn/Brip1/Ripor2/Ccnb1/E2f1/Ccr7/Lgals7/Wdr62/Il21/Cbx8/Cxcr3/Cdc20/Tgfbr3/Orc1/Plac8/Chek1/St6gal1/Recql4/Pmaip1/Cd200/L…	70
GO:0051383	kinetochore organization	8/410	20/8008	3.22505e-06	0.000104596	9.23322e-05	Dlgap5/Cenpa/Cenph/Ndc80/Cenpe/Nuf2/Kntc1/Cenps	8
GO:0042129	regulation of T cell proliferation	19/410	112/8008	3.36946e-06	0.000108304	9.56053e-05	Cd4/Cd40lg/Slfn1/Slamf1/Cd3e/Cd28/Zc3h12d/Adk/Cd6/Ctla4/Prkcq/Sh3rf1/Btla/Ripor2/Ccr7/Lgals7/Il21/Lgals3/Cd80	19
GO:0030155	regulation of cell adhesion	42/410	393/8008	3.72302e-06	0.000118609	0.000104702	Cd4/Cd40lg/Slfn1/Cd5/Slamf1/Cd3e/Cd28/Zc3h12d/Lck/Adk/Cd6/Il6ra/Malt1/Lef1/Kif14/Dpp4/S1pr1/Il10/Ctla4/Pde4d/Prkcq/Tesc/Itga6/Myb/Prkca/Ass1/Acp5/Gpm6b/Tigit/Btla/Zdhhc2/Ripor2/Lgals1/Ccr7/Lgals7/Il21/Chst2/Cxcr3/St6gal1/Lgals3/Csf1/Cd80	42
GO:0050670	regulation of lymphocyte proliferation	22/410	145/8008	3.92835e-06	0.000122389	0.000108039	Cd4/Cd40lg/Slfn1/Slamf1/Cd3e/Cd28/Tnfrsf4/Zc3h12d/Adk/Cd6/Il10/Ctla4/Prkcq/Sh3rf1/Tnfrsf13b/Btla/Ripor2/Ccr7/Lgals7/Il21/Lgals3/Cd80	22
GO:0000212	meiotic spindle organization	7/410	15/8008	3.94365e-06	0.000122389	0.000108039	Ndc80/Ccnb2/Aspm/Espl1/Cenpe/Fbxo5/Aurka	7
GO:0051482	positive regulation of cytosolic calcium ion concentration involved in phospholipase C-activating G protein-coupled signaling pathway	7/410	15/8008	3.94365e-06	0.000122389	0.000108039	Gpr174/S1pr1/F2rl1/P2ry10b/F2rl3/Gna15/Gpr55	7
GO:0006261	DNA-templated DNA replication	19/410	114/8008	4.42058e-06	0.000136018	0.00012007	E2f8/Cdc6/Dbf4/Ticrr/Pola1/Fbxo5/Timeless/Rad51/Pole/Gins3/Ccne1/Gins1/Pole2/Mcm10/Ccne2/Eme1/Orc1/Cenps/Recql4	19
GO:0050000	chromosome localization	14/410	66/8008	4.57411e-06	0.000139549	0.000123187	Birc5/Kif2c/Spag5/Cdca8/Cdca5/Ndc80/Aurkb/Kif14/Cenpe/Cenpf/Nuf2/Psrc1/Ccnb1/Kif22	14
GO:0032465	regulation of cytokinesis	13/410	58/8008	5.25871e-06	0.000159087	0.000140434	Racgap1/Rab11fip4/Cit/Cdc25b/E2f8/Cdc6/Aurkb/Kif14/Cenpv/Kif20a/Plk1/Ect2/Aurka	13
GO:0046649	lymphocyte activation	48/410	488/8008	7.50066e-06	0.00022502	0.000198636	Cd4/Cd40lg/Slfn1/Cd5/Slamf1/Cd2/Themis/Cd3e/Cd28/Cd3d/Tnfrsf4/Zc3h12d/Lck/Slamf6/Adk/Tnfsf8/Itm2a/Cd6/Cd3g/Lat/P2rx7/Fancd2/Il6ra/Malt1/Lef1/Dpp4/F2rl1/Il10/Zbtb32/Ctla4/Prkcq/Sit1/Myb/Sh3rf1/Tnfrsf13b/Tigit/Btla/Ripor2/Lgals1/Ccr7/Lgals7/Il21/Exo1/Hsh2d/Ccr6/Bcl2a1d/Lgals3/Cd80	48
GO:0033043	regulation of organelle organization	60/410	665/8008	8.08978e-06	0.000240688	0.000212467	Slamf1/Cd28/Ehd3/Birc5/Tacc3/Cit/Ska1/Spag5/Bub1/P2rx7/Ccnf/Cdca5/Ndc80/Rad51ap1/Nusap1/Tpx2/Cdc6/Ube2c/Aurkb/Mki67/S1pr1/Top2a/F2rl1/Ttk/Stil/Celsr1/Cenpe/Syt11/Prkcq/Fbxo5/Stmn1/Cdca2/Pif1/Kntc1/Bub1b/Psrc1/Mad2l1/Gpsm2/Kifc1/Ckap2/Nek2/Gpm6b/Wrap73/Cenpv/Ripor2/Tigar/Ccnb1/Inf2/Plk1/Ect2/Zwilch/Ska3/Aurka/Ska2/Trip13/Cdc20/Chek1/Recql4/Pmaip1/Mmp9	60
GO:0007080	mitotic metaphase plate congression	11/410	44/8008	9.17476e-06	0.000270731	0.000238987	Kif2c/Cdca8/Cdca5/Ndc80/Aurkb/Kif14/Cenpe/Nuf2/Psrc1/Ccnb1/Kif22	11
GO:0032467	positive regulation of cytokinesis	8/410	23/8008	1.09548e-05	0.000320629	0.000283035	Racgap1/Cit/Cdc25b/Cdc6/Aurkb/Kif14/Cenpv/Ect2	8
GO:0045143	homologous chromosome segregation	8/410	24/8008	1.57038e-05	0.000449217	0.000396545	Sgo1/Fancd2/Espl1/Ccne1/Brip1/Plk1/Ccne2/Trip13	8
GO:0051445	regulation of meiotic cell cycle	8/410	24/8008	1.57038e-05	0.000449217	0.000396545	Cdc25b/Rad51ap1/Aspm/Ttk/Fbxo5/Cdc25c/Trip13/Cdc20	8
GO:0050865	regulation of cell activation	38/410	361/8008	1.57226e-05	0.000449217	0.000396545	Cd4/Cd40lg/Slfn1/Cd5/Slamf1/Cd3e/Cd28/Tnfrsf4/Zc3h12d/Lck/Adk/Cd6/Lat/Fancd2/Il6ra/Malt1/Lef1/Dpp4/F2rl1/Il10/Ctla4/Syt11/Prkcq/Sit1/Myb/Prkca/Sh3rf1/Tnfrsf13b/Tigit/Btla/Ripor2/Lgals1/Ccr7/Lgals7/Il21/Cd200/Lgals3/Cd80	38
GO:0006974	cellular response to DNA damage stimulus	53/410	576/8008	1.68326e-05	0.000477144	0.000421199	Bcl2a1b/Uhrf1/Neil3/Cdca5/Fancd2/Rad51ap1/Cdk1/Foxm1/Ticrr/Pclaf/Dtl/Pola1/Top2a/Esco2/Ctla4/Rnaseh2b/Crip1/Fanci/Clspn/Fbxo5/Bard1/Timeless/Brca1/Parpbp/Pif1/Rad51/Rad54l/Mcm8/Pole/Gins2/Ddit4/Brip1/Fbxo45/Tigar/E2f1/Pole2/Aunip/Plk1/Kif22/Mcm10/Exo1/Fignl1/Chaf1a/Cbx8/Cdkn3/Chek2/Eme1/Trip13/Bcl2a1d/Chek1/Cenps/Recql4/Pmaip1	53
GO:0006259	DNA metabolic process	54/410	592/8008	1.78257e-05	0.000501347	0.000442563	Cd40lg/Cd28/Uhrf1/Neil3/Cdca5/Fancd2/Rad51ap1/Cdc6/Foxm1/Ticrr/Pclaf/Dtl/Aurkb/Pola1/Lef1/Top2a/Esco2/Prkcq/Fanci/Clspn/Bard1/Timeless/Brca1/Parpbp/Pif1/Rad51/Rad54l/Mcm8/Pole/Gins2/Gins3/Nek2/Ccne1/Brip1/Tigar/Gins1/Pole2/Aunip/Kif22/Mcm10/Zbtb48/Ccne2/Exo1/Fignl1/Chaf1a/Cbx8/Chek2/Eme1/Ccr6/Trip13/Orc1/Chek1/Cenps/Recql4	54
GO:0051249	regulation of lymphocyte activation	33/410	298/8008	2.07545e-05	0.000579195	0.000511284	Cd4/Cd40lg/Slfn1/Cd5/Slamf1/Cd3e/Cd28/Tnfrsf4/Zc3h12d/Lck/Adk/Cd6/Lat/Fancd2/Malt1/Lef1/Dpp4/Il10/Ctla4/Prkcq/Sit1/Myb/Sh3rf1/Tnfrsf13b/Tigit/Btla/Ripor2/Lgals1/Ccr7/Lgals7/Il21/Lgals3/Cd80	33
GO:0007076	mitotic chromosome condensation	6/410	13/8008	2.19174e-05	0.00060507	0.000534124	Ncaph/Cdca5/Nusap1/Ncapg/Ncapd2/Phf13	6
GO:0050852	T cell receptor signaling pathway	16/410	95/8008	2.20178e-05	0.00060507	0.000534124	Sh2d1a/Themis/Cd3e/Cd247/Cd28/Lck/Trat1/Fyb/Ubash3a/Malt1/Cacnb3/Ctla4/Pde4d/Ccr7/Bcl2a1d/Lgals3	16
GO:0072507	divalent inorganic cation homeostasis	26/410	211/8008	2.57752e-05	0.000694924	0.000613444	Cd4/Gpr174/Lck/Got1/P2rx7/Mcub/S1pr1/F2rl1/Cacnb3/Pde4d/Fasl/Prkca/Mt1/Hexb/Ccr7/P2ry10b/Fam20a/Tbxa2r/F2rl3/Slc39a8/Cxcr3/Ccr6/Gna15/Gpr55/Cxcr1/Mt2	26
GO:0010971	positive regulation of G2/M transition of mitotic cell cycle	7/410	19/8008	2.58149e-05	0.000694924	0.000613444	Cdc25b/Lmnb1/Cdk1/Dtl/Fbxo5/Cdc25c/Ccnb1	7
GO:0051302	regulation of cell division	15/410	86/8008	2.58666e-05	0.000694924	0.000613444	Racgap1/Rab11fip4/Cit/Cdc25b/E2f8/Kif18b/Cdc6/Aurkb/Kif14/Aspm/Cenpv/Kif20a/Plk1/Ect2/Aurka	15
GO:0002694	regulation of leukocyte activation	36/410	343/8008	2.828e-05	0.000754134	0.00066571	Cd4/Cd40lg/Slfn1/Cd5/Slamf1/Cd3e/Cd28/Tnfrsf4/Zc3h12d/Lck/Adk/Cd6/Lat/Fancd2/Malt1/Lef1/Dpp4/F2rl1/Il10/Ctla4/Syt11/Prkcq/Sit1/Myb/Sh3rf1/Tnfrsf13b/Tigit/Btla/Ripor2/Lgals1/Ccr7/Lgals7/Il21/Cd200/Lgals3/Cd80	36
GO:0006281	DNA repair	38/410	371/8008	2.91735e-05	0.000772239	0.000681693	Uhrf1/Neil3/Cdca5/Fancd2/Rad51ap1/Foxm1/Ticrr/Pclaf/Dtl/Pola1/Esco2/Fanci/Clspn/Bard1/Timeless/Brca1/Parpbp/Pif1/Rad51/Rad54l/Mcm8/Pole/Gins2/Brip1/Tigar/Pole2/Aunip/Kif22/Exo1/Fignl1/Chaf1a/Cbx8/Chek2/Eme1/Trip13/Chek1/Cenps/Recql4	38
GO:0045321	leukocyte activation	51/410	558/8008	2.96037e-05	0.000777907	0.000686697	Cd4/Cd40lg/Slfn1/Cd5/Slamf1/Cd2/Themis/Cd3e/Cd28/Cd3d/Tnfrsf4/Zc3h12d/Lck/Slamf6/Adk/Tnfsf8/Itm2a/Cd6/Cd3g/Lat/P2rx7/Fancd2/Ndrg1/Il6ra/Malt1/Lef1/Dpp4/F2rl1/Il10/Zbtb32/Ctla4/Syt11/Prkcq/Sit1/Myb/Sh3rf1/Tnfrsf13b/Tigit/Btla/Ripor2/Lgals1/Ccr7/Lgals7/Il21/Exo1/Hsh2d/Ccr6/Bcl2a1d/Cd200/Lgals3/Cd80	51
GO:0002682	regulation of immune system process	65/410	773/8008	3.21817e-05	0.000839523	0.000741087	Sh2d1a/Cd4/Cd40lg/Slfn1/Cd5/Slamf1/Themis/Cd3e/Cd247/Cd28/Tnfrsf4/Zc3h12d/Lck/Slamf6/Adk/Cd6/Trat1/Fyb/Ttll12/Lat/P2rx7/Fancd2/Ubash3a/Malt1/Lef1/Dpp4/F2rl1/Cacnb3/Il10/Ctla4/Syt11/Pde4d/Prkcq/Tesc/Sit1/Myb/Prkca/Sh3rf1/Tnfrsf13b/Tigit/Btla/Lgmn/Cd8b1/Ripor2/Lgals1/Ccr7/Rnf125/Lgals7/Nme2/Il21/Zbp1/Chst2/Cxcr3/Ccr6/Pvr/Sell/Gpr55/Bcl2a1d/Dhx58/Cd200/Lgals3/Oas3/Csf1/Mmp9/Cd80	65
GO:0000079	regulation of cyclin-dependent protein serine/threonine kinase activity	11/410	50/8008	3.38337e-05	0.000870009	0.000767999	Ccnf/Ccna2/Cdc6/Cdkn2c/Ccnb2/Stil/Psrc1/Ccne1/Ccnb1/Plk1/Ccne2	11
GO:0000281	mitotic cytokinesis	11/410	50/8008	3.38337e-05	0.000870009	0.000767999	Racgap1/Birc5/Cenpa/Cit/Nusap1/Cep55/Stmn1/Ckap2/Kif20a/Plk1/Ect2	11
GO:0034502	protein localization to chromosome	14/410	78/8008	3.44364e-05	0.000874248	0.000771741	Cenpa/Cdca5/Ndc80/Cdk1/Aurkb/Knl1/Ttk/Esco2/Kntc1/Mcm8/Bub1b/Plk1/Zwilch/Haspin	14
GO:0061640	cytoskeleton-dependent cytokinesis	12/410	59/8008	3.44842e-05	0.000874248	0.000771741	Racgap1/Birc5/Cenpa/Cit/Nusap1/Cep55/Aurkb/Stmn1/Ckap2/Kif20a/Plk1/Ect2	12
GO:1901989	positive regulation of cell cycle phase transition	14/410	79/8008	3.99365e-05	0.00100539	0.00088751	Birc5/Cdc25b/Lmnb1/Cdca5/Cdk1/Dbf4/Ube2c/Dtl/Cenpe/Fbxo5/Cdc25c/Ccnb1/Aurka/Chek2	14
GO:1904029	regulation of cyclin-dependent protein kinase activity	11/410	51/8008	4.11856e-05	0.00102964	0.000908914	Ccnf/Ccna2/Cdc6/Cdkn2c/Ccnb2/Stil/Psrc1/Ccne1/Ccnb1/Plk1/Ccne2	11
GO:0072503	cellular divalent inorganic cation homeostasis	25/410	205/8008	4.39391e-05	0.0010909	0.000962992	Cd4/Gpr174/Lck/Got1/P2rx7/Mcub/S1pr1/F2rl1/Cacnb3/Pde4d/Fasl/Prkca/Mt1/Hexb/Ccr7/P2ry10b/Tbxa2r/F2rl3/Slc39a8/Cxcr3/Ccr6/Gna15/Gpr55/Cxcr1/Mt2	25
GO:0051480	regulation of cytosolic calcium ion concentration	19/410	134/8008	4.7397e-05	0.00116869	0.00103166	Cd4/Gpr174/Lck/Got1/P2rx7/S1pr1/F2rl1/Cacnb3/Pde4d/Fasl/Ccr7/P2ry10b/Tbxa2r/F2rl3/Cxcr3/Ccr6/Gna15/Gpr55/Cxcr1	19
GO:0007204	positive regulation of cytosolic calcium ion concentration	18/410	123/8008	4.89114e-05	0.00119783	0.00105738	Cd4/Gpr174/Lck/P2rx7/S1pr1/F2rl1/Cacnb3/Pde4d/Fasl/Ccr7/P2ry10b/Tbxa2r/F2rl3/Cxcr3/Ccr6/Gna15/Gpr55/Cxcr1	18
GO:0001775	cell activation	53/410	600/8008	5.19433e-05	0.00126349	0.00111534	Cd4/Cd40lg/Slfn1/Cd5/Slamf1/Cd2/Themis/Cd3e/Cd28/Cd3d/Tnfrsf4/Zc3h12d/Lck/Slamf6/Adk/Tnfsf8/Itm2a/Cd6/Cd3g/Lat/P2rx7/Fancd2/Ndrg1/Il6ra/Malt1/Lef1/Dpp4/F2rl1/Il10/Zbtb32/Ctla4/Syt11/Prkcq/Sit1/Myb/Prkca/Sh3rf1/Tnfrsf13b/Tigit/Btla/Ripor2/Lgals1/Ccr7/Lgals7/Il21/Exo1/Hsh2d/Ccr6/Entpd1/Bcl2a1d/Cd200/Lgals3/Cd80	53
GO:0006270	DNA replication initiation	8/410	28/8008	5.53713e-05	0.00133783	0.00118097	Cdc6/Ticrr/Pola1/Gins3/Ccne1/Mcm10/Ccne2/Orc1	8
GO:0022409	positive regulation of cell-cell adhesion	22/410	171/8008	5.61197e-05	0.00134687	0.00118895	Cd4/Cd40lg/Cd5/Slamf1/Cd3e/Cd28/Lck/Adk/Cd6/Il6ra/Malt1/Lef1/Dpp4/Pde4d/Prkcq/Itga6/Myb/Lgals1/Ccr7/Il21/Chst2/Cd80	22
GO:0051382	kinetochore assembly	6/410	15/8008	5.85469e-05	0.00139582	0.00123216	Dlgap5/Cenpa/Cenph/Cenpe/Kntc1/Cenps	6
GO:0022412	cellular process involved in reproduction in multicellular organism	21/410	160/8008	6.15429e-05	0.00145759	0.00128669	Izumo1r/Ncaph/Cdc25b/Ndc80/Ccnb2/Aspm/Top2a/Ttk/Cenpe/Fbxo5/Prdx4/Mastl/Brip1/Ccnb1/Paqr7/Hexb/Plk1/Fignl1/Aurka/Ccr6/Trip13	21
GO:0006310	DNA recombination	24/410	198/8008	6.88409e-05	0.00161979	0.00142986	Cd40lg/Cd28/Fancd2/Rad51ap1/Lef1/Top2a/Timeless/Brca1/Parpbp/Pif1/Rad51/Rad54l/Mcm8/Gins2/Brip1/Aunip/Exo1/Fignl1/Eme1/Ccr6/Trip13/Chek1/Cenps/Recql4	24
GO:0007200	phospholipase C-activating G protein-coupled receptor signaling pathway	7/410	22/8008	7.64133e-05	0.00176126	0.00155475	Gpr174/S1pr1/F2rl1/P2ry10b/F2rl3/Gna15/Gpr55	7
GO:0031295	T cell costimulation	7/410	22/8008	7.64133e-05	0.00176126	0.00155475	Cd5/Cd3e/Cd28/Dpp4/Lgals1/Ccr7/Cd80	7
GO:1902751	positive regulation of cell cycle G2/M phase transition	7/410	22/8008	7.64133e-05	0.00176126	0.00155475	Cdc25b/Lmnb1/Cdk1/Dtl/Fbxo5/Cdc25c/Ccnb1	7
GO:0002250	adaptive immune response	29/410	264/8008	7.68106e-05	0.00176126	0.00155475	Sh2d1a/Cd4/Cd40lg/Slamf1/Themis/Cd3e/Cd247/Cd28/Cd3d/Slamf6/Trat1/Cd3g/Lat/P2rx7/Il6ra/Malt1/Lef1/Dpp4/Ctla4/Prkcq/Sit1/Tnfrsf13b/Btla/Cd8b1/Ccr7/Rnf125/Exo1/Ccr6/Pvr	29
GO:0051656	establishment of organelle localization	28/410	251/8008	7.79035e-05	0.00177502	0.00156689	Bicdl1/Birc5/Kif2c/Cenpa/Tacc3/Lat/Spag5/Cdca8/Cdca5/Ndc80/Nusap1/Sapcd2/Aurkb/Kif14/Cenpe/Cenpf/Syt11/Nuf2/Madd/Borcs5/Psrc1/Mad2l1/Gpsm2/Kifc1/Ccnb1/Plk1/Kif22/Trim46	28
GO:0071103	DNA conformation change	18/410	128/8008	8.3472e-05	0.00188993	0.00166833	Ncaph/Ncapg2/Cdca5/Cdk1/Nusap1/Ncapg/Ncapd2/Phf13/Top2a/Oip5/Pif1/Rad51/Mcm8/Asf1b/Cenpv/Ccnb1/Chaf1a/Recql4	18
GO:0007186	G protein-coupled receptor signaling pathway	23/410	188/8008	8.43568e-05	0.00189149	0.00166971	Gpr174/Aplp1/S1pr1/F2rl1/Celsr1/Pde4d/S1pr4/Stmn1/Adcy6/Rnf157/Ccr7/P2ry10b/Nme2/Rgs16/Tbxa2r/Penk/F2rl3/Cxcr3/Ccr6/Gna15/Gpr55/Cxcr1/Entpd1	23
GO:0002684	positive regulation of immune system process	45/410	491/8008	8.45915e-05	0.00189149	0.00166971	Sh2d1a/Cd4/Cd40lg/Cd5/Slamf1/Themis/Cd3e/Cd247/Cd28/Tnfrsf4/Lck/Slamf6/Adk/Cd6/Trat1/Fyb/P2rx7/Ubash3a/Malt1/Lef1/Dpp4/F2rl1/Cacnb3/Il10/Ctla4/Pde4d/Prkcq/Tesc/Myb/Prkca/Lgmn/Ripor2/Lgals1/Ccr7/Il21/Zbp1/Ccr6/Pvr/Sell/Bcl2a1d/Dhx58/Lgals3/Csf1/Mmp9/Cd80	45
GO:0051307	meiotic chromosome separation	6/410	16/8008	8.9653e-05	0.00199229	0.00175869	Ncaph/Top2a/Ttk/Espl1/Eme1/Cenps	6
GO:0031570	DNA integrity checkpoint signaling	15/410	96/8008	9.70879e-05	0.00214427	0.00189285	Fancd2/Cdk1/Cdc6/Ticrr/Dtl/Rnaseh2b/Clspn/Timeless/Brca1/E2f1/Plk1/Chek2/Eme1/Orc1/Chek1	15
GO:0055074	calcium ion homeostasis	23/410	190/8008	9.93637e-05	0.00218115	0.00192541	Cd4/Gpr174/Lck/Got1/P2rx7/Mcub/S1pr1/F2rl1/Cacnb3/Pde4d/Fasl/Prkca/Hexb/Ccr7/P2ry10b/Fam20a/Tbxa2r/F2rl3/Cxcr3/Ccr6/Gna15/Gpr55/Cxcr1	23
GO:0090307	mitotic spindle assembly	11/410	56/8008	0.000102173	0.00222922	0.00196784	Racgap1/Kif11/Tpx2/Aurkb/Kifc1/Nek2/Wrap73/Ripor2/Plk1/Chek2/Cdc20	11
GO:0044774	mitotic DNA integrity checkpoint signaling	12/410	66/8008	0.000109511	0.00236073	0.00208393	Fancd2/Cdk1/Cdc6/Ticrr/Dtl/Clspn/Brca1/Plk1/Chek2/Eme1/Orc1/Chek1	12
GO:1901992	positive regulation of mitotic cell cycle phase transition	12/410	66/8008	0.000109511	0.00236073	0.00208393	Birc5/Cdc25b/Lmnb1/Cdca5/Cdk1/Dbf4/Ube2c/Dtl/Cenpe/Fbxo5/Cdc25c/Ccnb1	12
GO:0007062	sister chromatid cohesion	9/410	39/8008	0.000118881	0.00252745	0.0022311	Bub1/Sgo1/Cdca5/Esco2/Bub1b/Kif22/Haspin/Cdc20/Recql4	9
GO:0051653	spindle localization	9/410	39/8008	0.000118881	0.00252745	0.0022311	Cenpa/Spag5/Ndc80/Nusap1/Sapcd2/Aspm/Mad2l1/Gpsm2/Plk1	9
GO:0045931	positive regulation of mitotic cell cycle	14/410	87/8008	0.000119352	0.00252745	0.0022311	Birc5/Cdc25b/Lmnb1/Cdca5/Cdk1/Dbf4/Ube2c/Dtl/Cenpe/Fbxo5/Prkca/Lgmn/Cdc25c/Ccnb1	14
GO:0006302	double-strand break repair	21/410	168/8008	0.000125591	0.00264402	0.00233401	Cdca5/Fancd2/Rad51ap1/Foxm1/Pola1/Esco2/Timeless/Brca1/Parpbp/Rad51/Rad54l/Mcm8/Gins2/Brip1/Aunip/Fignl1/Chek2/Eme1/Trip13/Chek1/Recql4	21
GO:0002376	immune system process	97/410	1338/8008	0.000130248	0.00272612	0.00240648	Sh2d1a/Cd4/Cd40lg/Slfn1/Cd5/Slamf1/Cd2/Gpr174/Themis/Cd3e/Cd247/Cd28/Cd3d/Tnfrsf4/Zc3h12d/Lck/Slamf6/Adk/Tnfsf8/Itm2a/Cd6/Trat1/Cd3g/Fyb/Ttll12/Tacc3/Lat/P2rx7/Ncapg2/Fancd2/Ndrg1/Il6ra/Ubash3a/Ccnb2/Malt1/Lef1/Dpp4/S1pr1/Top2a/F2rl1/Cacnb3/Il10/Zbtb32/Esco2/Ctla4/Syt11/Pde4d/Prkcq/Tesc/Itga6/Fasl/Sit1/Myb/Prkca/Sh3rf1/Tnfrsf13b/Acp5/Tigit/Btla/Ddit4/Lgmn/Cd8b1/Gbp3/Actn1/Ext1/Ripor2/Lgals1/Ccr7/…	97
GO:0032886	regulation of microtubule-based process	19/410	145/8008	0.000140224	0.00290118	0.00256101	Tacc3/Ska1/Spag5/Ccnf/Tpx2/Stil/Stmn1/Borcs5/Psrc1/Gpsm2/Kifc1/Ckap2/Ripor2/Plk1/Wdr62/Trim46/Ska3/Ska2/Ccr6	19
GO:0031294	lymphocyte costimulation	7/410	24/8008	0.000141841	0.00291363	0.002572	Cd5/Cd3e/Cd28/Dpp4/Lgals1/Ccr7/Cd80	7
GO:0050921	positive regulation of chemotaxis	11/410	58/8008	0.000142444	0.00291363	0.002572	Slamf1/S1pr1/F2rl1/Prkca/Lgmn/Ripor2/Ccr7/Cxcr3/Ccr6/Sell/Csf1	11
GO:0032946	positive regulation of mononuclear cell proliferation	14/410	89/8008	0.00015338	0.0031196	0.00275382	Cd4/Cd40lg/Slamf1/Cd3e/Cd28/Tnfrsf4/Adk/Cd6/Prkcq/Ccr7/Il21/St6gal1/Csf1/Cd80	14
GO:0035556	intracellular signal transduction	95/410	1314/8008	0.000173234	0.00349268	0.00308316	Cd4/Slamf1/Gpr174/Cd3e/Cd28/Lck/Racgap1/Bcl2a1b/Trat1/Birc5/E2f2/Cit/Lat/Lmnb1/Bub1/P2rx7/Ndrg2/Fancd2/Ndc80/Cdk1/Il6ra/Cdc6/Foxm1/Ticrr/Rasa3/Dtl/Cep55/Aurkb/Malt1/Kif14/Arhgap31/F2rl1/Ttk/Stil/Celsr1/Cenpe/Pde4d/Rnaseh2b/Crip1/Prkcq/Clspn/Timeless/Fasl/Madd/Stmn1/Brca1/Prkca/Traf5/Kntc1/Sh3rf1/Bub1b/Mad2l1/Gpsm2/Mastl/Ddit4/Inpp5f/Ripor2/Melk/Ccnb1/Rhebl1/Adcy6/E2f1/Mt1/Rnf157/Ccr7/P2ry10b/Rnf1…	95
GO:0010639	negative regulation of organelle organization	25/410	223/8008	0.000173852	0.00349268	0.00308316	Birc5/Bub1/Ccnf/Ndc80/Tpx2/Aurkb/S1pr1/Top2a/Ttk/Cenpe/Fbxo5/Stmn1/Pif1/Kntc1/Bub1b/Mad2l1/Kifc1/Ckap2/Tigar/Ccnb1/Plk1/Zwilch/Trip13/Chek1/Recql4	25
GO:0030595	leukocyte chemotaxis	15/410	101/8008	0.000174634	0.00349268	0.00308316	Slamf1/Dpp4/S1pr1/F2rl1/Pde4d/Prkca/Csf1/Lgmn/Ripor2/Ccr7/Cxcr3/Ccr6/Sell/Cxcr1/Lgals3	15
GO:0050870	positive regulation of T cell activation	18/410	136/8008	0.000184031	0.00366029	0.00323111	Cd4/Cd40lg/Cd5/Slamf1/Cd3e/Cd28/Lck/Adk/Cd6/Malt1/Lef1/Dpp4/Prkcq/Myb/Lgals1/Ccr7/Il21/Cd80	18
GO:0032695	negative regulation of interleukin-12 production	5/410	12/8008	0.000201567	0.00398704	0.00351955	Slamf1/Il10/Acp5/Tigit/Ccr7	5
GO:0006874	cellular calcium ion homeostasis	22/410	187/8008	0.000213018	0.00419052	0.00369918	Cd4/Gpr174/Lck/Got1/P2rx7/Mcub/S1pr1/F2rl1/Cacnb3/Pde4d/Fasl/Prkca/Hexb/Ccr7/P2ry10b/Tbxa2r/F2rl3/Cxcr3/Ccr6/Gna15/Gpr55/Cxcr1	22
GO:0045058	T cell selection	9/410	42/8008	0.00021819	0.00426893	0.0037684	Cd4/Themis/Cd3e/Cd28/Cd3d/Slamf6/Cd3g/Il6ra/Ccr7	9
GO:1903039	positive regulation of leukocyte cell-cell adhesion	19/410	151/8008	0.000240105	0.00467232	0.00412448	Cd4/Cd40lg/Cd5/Slamf1/Cd3e/Cd28/Lck/Adk/Cd6/Malt1/Lef1/Dpp4/Prkcq/Myb/Lgals1/Ccr7/Il21/Chst2/Cd80	19
GO:0009617	response to bacterium	29/410	282/8008	0.000245128	0.00474442	0.00418813	Cd4/Trac/Tnfsf8/Cd6/P2rx7/Malt1/F2rl1/Il10/Syt11/Pde4d/Prkca/Acp5/Gbp3/AA467197/Scarb1/Ccr7/Fam20a/Tbxa2r/Penk/Ggt7/Plac8/Il12rb2/Dhx58/Lyz2/Ifit1/Hba-a2/Oas3/Mt2/Cd80	29
GO:0051781	positive regulation of cell division	8/410	34/8008	0.000246709	0.00474948	0.0041926	Racgap1/Cit/Cdc25b/Cdc6/Aurkb/Kif14/Cenpv/Ect2	8
GO:0044818	mitotic G2/M transition checkpoint	9/410	43/8008	0.000263671	0.00504903	0.00445702	Cdk1/Cdc6/Ticrr/Dtl/Clspn/Brca1/Plk1/Orc1/Chek1	9
GO:0070665	positive regulation of leukocyte proliferation	14/410	94/8008	0.000277218	0.00528035	0.00466122	Cd4/Cd40lg/Slamf1/Cd3e/Cd28/Tnfrsf4/Adk/Cd6/Prkcq/Ccr7/Il21/St6gal1/Csf1/Cd80	14
GO:0071621	granulocyte chemotaxis	10/410	53/8008	0.000297932	0.00564503	0.00498314	Slamf1/Dpp4/Pde4d/Prkca/Ripor2/Ccr7/Sell/Cxcr1/Lgals3/Csf1	10
GO:0051293	establishment of spindle localization	8/410	35/8008	0.000305722	0.00576231	0.00508667	Cenpa/Spag5/Ndc80/Nusap1/Sapcd2/Mad2l1/Gpsm2/Plk1	8
GO:0050920	regulation of chemotaxis	13/410	84/8008	0.000309689	0.00580667	0.00512583	Slamf1/Dpp4/S1pr1/F2rl1/Prkca/Lgmn/Ripor2/Ccr7/Cxcr3/Ccr6/Sell/St6gal1/Csf1	13
GO:0000076	DNA replication checkpoint signaling	5/410	13/8008	0.000313848	0.00580997	0.00512874	Cdc6/Ticrr/Clspn/Timeless/Orc1	5
GO:0051315	attachment of mitotic spindle microtubules to kinetochore	5/410	13/8008	0.000313848	0.00580997	0.00512874	Kif2c/Ndc80/Aurkb/Cenpe/Nuf2	5
GO:0050851	antigen receptor-mediated signaling pathway	16/410	118/8008	0.000314706	0.00580997	0.00512874	Sh2d1a/Themis/Cd3e/Cd247/Cd28/Lck/Trat1/Fyb/Ubash3a/Malt1/Cacnb3/Ctla4/Pde4d/Ccr7/Bcl2a1d/Lgals3	16
GO:0040001	establishment of mitotic spindle localization	7/410	27/8008	0.000318442	0.00584893	0.00516314	Cenpa/Ndc80/Nusap1/Sapcd2/Mad2l1/Gpsm2/Plk1	7
GO:0060326	cell chemotaxis	17/410	131/8008	0.000350489	0.00640488	0.0056539	Slamf1/Lef1/Dpp4/S1pr1/F2rl1/Pde4d/Prkcq/Prkca/Lgmn/Ripor2/Ccr7/Cxcr3/Ccr6/Sell/Cxcr1/Lgals3/Csf1	17
GO:0007276	gamete generation	27/410	262/8008	0.000386703	0.00703096	0.00620657	Racgap1/Ncaph/Cit/Cdc25b/Fancd2/Ndc80/Ccnb2/Aspm/Top2a/Ttk/Cenpe/Fbxo5/Cip2a/Mcm8/Prdx4/Mastl/Ift27/Brip1/Ccnb1/Paqr7/Hexb/Plk1/Fignl1/Aurka/Ggt7/Ccr6/Trip13	27
GO:0042102	positive regulation of T cell proliferation	11/410	65/8008	0.000405416	0.00731038	0.00645323	Cd4/Cd40lg/Slamf1/Cd3e/Cd28/Adk/Cd6/Prkcq/Ccr7/Il21/Cd80	11
GO:0051294	establishment of spindle orientation	7/410	28/8008	0.000406132	0.00731038	0.00645323	Cenpa/Spag5/Ndc80/Sapcd2/Mad2l1/Gpsm2/Plk1	7
GO:0006955	immune response	65/410	843/8008	0.00041551	0.00744198	0.0065694	Sh2d1a/Cd4/Cd40lg/Slamf1/Themis/Cd3e/Cd247/Cd28/Cd3d/Lck/Slamf6/Tnfsf8/Itm2a/Cd6/Trat1/Cd3g/Fyb/Ttll12/Lat/P2rx7/Il6ra/Ubash3a/Malt1/Lef1/Dpp4/F2rl1/Cacnb3/Il10/Ctla4/Syt11/Pde4d/Prkcq/Fasl/Sit1/Myb/Tnfrsf13b/Acp5/Btla/Ddit4/Cd8b1/Gbp3/Ext1/Lgals1/Ccr7/Rnf125/Il21/Exo1/Zbp1/Ifit2/Cxcr3/Ccr6/Pvr/Tgfbr3/Plac8/Cxcr1/Bcl2a1d/Dhx58/Lyz2/Pmaip1/Cd200/Lgals3/Ifit1/Oas3/Csf1/Cd80	65
GO:0006875	cellular metal ion homeostasis	26/410	250/8008	0.000429288	0.00765068	0.00675362	Cd4/Gpr174/Lck/Got1/P2rx7/Mcub/S1pr1/F2rl1/Cacnb3/Pde4d/Tesc/Fasl/Prkca/Mt1/Hexb/Ccr7/P2ry10b/Tbxa2r/F2rl3/Slc39a8/Cxcr3/Ccr6/Gna15/Gpr55/Cxcr1/Mt2	26
GO:1904666	regulation of ubiquitin protein ligase activity	5/410	14/8008	0.000467816	0.00829624	0.00732349	Fbxo5/Mad2l1/Mastl/Plk1/Cdc20	5
GO:0019953	sexual reproduction	30/410	308/8008	0.000489817	0.00864383	0.00763033	Izumo1r/Racgap1/Ncaph/Cit/Cdc25b/Fancd2/Ndc80/Ccnb2/Gnpda1/Aspm/Top2a/Ttk/Cenpe/Fbxo5/Cip2a/Mcm8/Prdx4/Mastl/Ift27/Brip1/Ccnb1/Paqr7/Hexb/Plk1/Fignl1/Aurka/Ggt7/Ccr6/Trip13/Cyp11a1	30
GO:0055065	metal ion homeostasis	28/410	280/8008	0.000494261	0.0086797	0.00766199	Cd4/Gpr174/Lck/Got1/P2rx7/Mcub/S1pr1/F2rl1/Cacnb3/Pde4d/Tesc/Fasl/Prkca/Ext1/Mt1/Hexb/Ccr7/P2ry10b/Fam20a/Tbxa2r/F2rl3/Slc39a8/Cxcr3/Ccr6/Gna15/Gpr55/Cxcr1/Mt2	28
GO:0044786	cell cycle DNA replication	7/410	29/8008	0.000512102	0.00894935	0.00790002	E2f8/Dbf4/Pola1/Fbxo5/Rad51/Gins3/Gins1	7
GO:0032649	regulation of interferon-gamma production	12/410	78/8008	0.000553877	0.00963265	0.00850321	Cd40lg/Slamf1/Cd2/Cd3e/Slamf6/F2rl1/Il10/Pde4d/Ccr7/Lgals7/Il21/Il12rb2	12
GO:0001556	oocyte maturation	5/410	15/8008	0.00067245	0.0115277	0.0101761	Cdc25b/Fbxo5/Ccnb1/Aurka/Trip13	5
GO:0009263	deoxyribonucleotide biosynthetic process	5/410	15/8008	0.00067245	0.0115277	0.0101761	Adk/Rrm2/Tyms/Dck/Nme2	5
GO:0010043	response to zinc ion	5/410	15/8008	0.00067245	0.0115277	0.0101761	P2rx7/Crip1/Ass1/Mt1/Mt2	5
GO:2000241	regulation of reproductive process	11/410	69/8008	0.000687143	0.0117238	0.0103491	Cdc25b/Rad51ap1/Aspm/Ttk/Fbxo5/Prdx4/Cdc25c/Aurka/Ccr6/Trip13/Cdc20	11
GO:0050900	leukocyte migration	20/410	177/8008	0.000691706	0.011746	0.0103687	Slamf1/Dpp4/S1pr1/F2rl1/Pde4d/Itga6/Prkca/Lgmn/Ext1/Ripor2/Ccr7/Chst2/Cxcr3/Ccr6/Sell/Cxcr1/Cd200/Lgals3/Csf1/Mmp9	20
GO:0002768	immune response-regulating cell surface receptor signaling pathway	17/410	139/8008	0.000703353	0.0118877	0.0104938	Sh2d1a/Themis/Cd3e/Cd247/Cd28/Lck/Trat1/Fyb/Ubash3a/Malt1/Cacnb3/Ctla4/Pde4d/Btla/Ccr7/Bcl2a1d/Lgals3	17
GO:0051347	positive regulation of transferase activity	26/410	260/8008	0.000780477	0.0131295	0.0115901	Cd4/Lat/Cdc25b/P2rx7/Il6ra/Tpx2/Cdc6/Aurkb/Malt1/Kif14/Stil/Cenpe/Prkcq/Clspn/Psrc1/Mastl/Nek2/Tigar/Trib2/Ccr7/Plk1/Ect2/Cdc20/Als2/Cd200/Csf1	26
GO:0000132	establishment of mitotic spindle orientation	6/410	23/8008	0.000832203	0.0139346	0.0123007	Cenpa/Ndc80/Sapcd2/Mad2l1/Gpsm2/Plk1	6
GO:0050778	positive regulation of immune response	29/410	304/8008	0.000848699	0.014145	0.0124865	Sh2d1a/Cd4/Cd40lg/Slamf1/Themis/Cd3e/Cd247/Cd28/Lck/Slamf6/Trat1/Fyb/P2rx7/Ubash3a/Malt1/Dpp4/F2rl1/Cacnb3/Il10/Ctla4/Pde4d/Prkcq/Myb/Ccr7/Il21/Zbp1/Pvr/Bcl2a1d/Lgals3	29
GO:0051129	negative regulation of cellular component organization	36/410	408/8008	0.000899019	0.0148462	0.0131055	Crbn/Birc5/Cit/Bub1/Ccnf/Ndc80/Tpx2/Aurkb/Kif14/Dpp4/S1pr1/Top2a/Ttk/Cenpe/Syt11/Fbxo5/Stmn1/Pif1/Kntc1/Pmepa1/Bub1b/Mad2l1/Kifc1/Ckap2/Inpp5f/Tigar/Ccnb1/Adcy6/Lgals1/Plk1/Zwilch/Trim46/Trip13/Chek1/Recql4/Lgals3	36
GO:0007129	homologous chromosome pairing at meiosis	5/410	16/8008	0.000937357	0.0153386	0.0135401	Fancd2/Ccne1/Brip1/Ccne2/Trip13	5
GO:0035025	positive regulation of Rho protein signal transduction	5/410	16/8008	0.000937357	0.0153386	0.0135401	Gpr174/F2rl1/P2ry10b/F2rl3/Gpr55	5
GO:0007095	mitotic G2 DNA damage checkpoint signaling	7/410	32/8008	0.000966813	0.015749	0.0139024	Cdk1/Ticrr/Dtl/Clspn/Brca1/Plk1/Chek1	7
GO:0010972	negative regulation of G2/M transition of mitotic cell cycle	9/410	51/8008	0.000989319	0.0159803	0.0141066	Cdk1/Cdc6/Ticrr/Dtl/Clspn/Brca1/Plk1/Orc1/Chek1	9
GO:0051640	organelle localization	31/410	336/8008	0.000989889	0.0159803	0.0141066	Bicdl1/Birc5/Kif2c/Cenpa/Tacc3/Lat/Spag5/Cdca8/Cdca5/Ndc80/Nusap1/Sapcd2/Aurkb/Kif14/Aspm/Cenpe/Cenpf/Syt11/Sytl2/Nuf2/Madd/Borcs5/Psrc1/Mad2l1/Gpsm2/Kifc1/Ccnb1/Plk1/Kif22/Borcs6/Trim46	31
GO:0007018	microtubule-based movement	17/410	144/8008	0.00105215	0.0169096	0.0149269	Bicdl1/Kif2c/Kif11/Kif15/Kif18b/Kif4/Kif14/Cenpe/Madd/Borcs5/Kifc1/Ift27/Kif20a/Kif22/Trim46/Ccr6/Sord	17
GO:0071622	regulation of granulocyte chemotaxis	6/410	24/8008	0.00106232	0.0169972	0.0150042	Slamf1/Dpp4/Ripor2/Ccr7/Sell/Csf1	6
GO:0140694	non-membrane-bounded organelle assembly	26/410	266/8008	0.00109449	0.0174344	0.0153902	Racgap1/Dlgap5/Cenpa/Kif11/Spag5/Cenph/Ndc80/Tpx2/Ccnb2/Aurkb/Aspm/Stil/Cenpe/Fbxo5/Kntc1/Gpsm2/Kifc1/Nek2/Wrap73/Ripor2/Plk1/Wdr62/Aurka/Chek2/Cdc20/Cenps	26
GO:0007100	mitotic centrosome separation	4/410	10/8008	0.00111103	0.0176199	0.0155539	Kif11/Nek2/Aurka/Chek1	4
GO:0048477	oogenesis	8/410	42/8008	0.00111945	0.0176755	0.015603	Cdc25b/Aspm/Fbxo5/Ccnb1/Paqr7/Hexb/Aurka/Trip13	8
GO:1902750	negative regulation of cell cycle G2/M phase transition	9/410	52/8008	0.00114342	0.0179752	0.0158676	Cdk1/Cdc6/Ticrr/Dtl/Clspn/Brca1/Plk1/Orc1/Chek1	9
GO:0002685	regulation of leukocyte migration	14/410	108/8008	0.001157	0.0181096	0.0159862	Slamf1/Dpp4/F2rl1/Lgmn/Ripor2/Ccr7/Chst2/Cxcr3/Ccr6/Sell/Cd200/Lgals3/Csf1/Mmp9	14
GO:0044703	multi-organism reproductive process	32/410	355/8008	0.00121515	0.0189374	0.0167169	Izumo1r/Racgap1/Ncaph/Cit/Cdc25b/Fancd2/Ndc80/Ccnb2/Gnpda1/Aspm/Top2a/Ttk/Cenpe/Fbxo5/Cip2a/Mcm8/Prdx4/Mastl/Ift27/Brip1/Ccnb1/Paqr7/Hexb/Plk1/Akr1c18/Fignl1/Aurka/Ggt7/Ccr6/Trip13/Cyp11a1/Mmp9	32
GO:0044773	mitotic DNA damage checkpoint signaling	10/410	63/8008	0.00123619	0.0191823	0.0169331	Fancd2/Cdk1/Ticrr/Dtl/Clspn/Brca1/Plk1/Chek2/Eme1/Chek1	10
GO:0002690	positive regulation of leukocyte chemotaxis	8/410	43/8008	0.00131505	0.0199113	0.0175767	Slamf1/F2rl1/Lgmn/Ripor2/Ccr7/Ccr6/Sell/Csf1	8
GO:0030593	neutrophil chemotaxis	8/410	43/8008	0.00131505	0.0199113	0.0175767	Dpp4/Pde4d/Prkca/Ripor2/Ccr7/Sell/Cxcr1/Lgals3	8
GO:0002688	regulation of leukocyte chemotaxis	9/410	53/8008	0.00131636	0.0199113	0.0175767	Slamf1/Dpp4/F2rl1/Lgmn/Ripor2/Ccr7/Ccr6/Sell/Csf1	9
GO:0032729	positive regulation of interferon-gamma production	9/410	53/8008	0.00131636	0.0199113	0.0175767	Cd40lg/Slamf1/Cd2/Cd3e/Slamf6/F2rl1/Pde4d/Il21/Il12rb2	9
GO:0032945	negative regulation of mononuclear cell proliferation	9/410	53/8008	0.00131636	0.0199113	0.0175767	Slfn1/Zc3h12d/Il10/Ctla4/Tnfrsf13b/Btla/Ripor2/Lgals7/Cd80	9
GO:0050672	negative regulation of lymphocyte proliferation	9/410	53/8008	0.00131636	0.0199113	0.0175767	Slfn1/Zc3h12d/Il10/Ctla4/Tnfrsf13b/Btla/Ripor2/Lgals7/Cd80	9
GO:0032609	interferon-gamma production	12/410	86/8008	0.00134736	0.020295	0.0179153	Cd40lg/Slamf1/Cd2/Cd3e/Slamf6/F2rl1/Il10/Pde4d/Ccr7/Lgals7/Il21/Il12rb2	12
GO:0090224	regulation of spindle organization	7/410	34/8008	0.00141438	0.0212156	0.0187281	Tacc3/Spag5/Tpx2/Psrc1/Gpsm2/Ripor2/Plk1	7
GO:0032504	multicellular organism reproduction	29/410	315/8008	0.00148105	0.0221236	0.0195296	Izumo1r/Racgap1/Ncaph/Cit/Cdc25b/Fancd2/Ndc80/Ccnb2/Aspm/Top2a/Ttk/Cenpe/Fbxo5/Cip2a/Mcm8/Prdx4/Mastl/Ift27/Brip1/Ccnb1/Paqr7/Hexb/Plk1/Fignl1/Aurka/Ggt7/Ccr6/Trip13/Cyp11a1	29
GO:0050671	positive regulation of lymphocyte proliferation	12/410	87/8008	0.00149247	0.022202	0.0195988	Cd4/Cd40lg/Slamf1/Cd3e/Cd28/Tnfrsf4/Adk/Cd6/Prkcq/Ccr7/Il21/Cd80	12
GO:0070664	negative regulation of leukocyte proliferation	9/410	54/8008	0.00150978	0.0223671	0.0197445	Slfn1/Zc3h12d/Il10/Ctla4/Tnfrsf13b/Btla/Ripor2/Lgals7/Cd80	9
GO:1903131	mononuclear cell differentiation	28/410	302/8008	0.00160178	0.0236329	0.0208619	Cd4/Cd40lg/Slamf1/Themis/Cd3e/Cd28/Cd3d/Lck/Slamf6/Tnfsf8/Itm2a/Cd3g/Fancd2/Il6ra/Malt1/Lef1/Dpp4/F2rl1/Il10/Ctla4/Myb/Sh3rf1/Lgals1/Ccr7/Il21/Ccr6/Bcl2a1d/Csf1	28
GO:0002285	lymphocyte activation involved in immune response	16/410	137/8008	0.0016414	0.0239232	0.0211182	Cd40lg/Cd28/Slamf6/Itm2a/Il6ra/Malt1/Lef1/F2rl1/Il10/Myb/Lgals1/Ccr7/Il21/Exo1/Ccr6/Lgals3	16
GO:0002429	immune response-activating cell surface receptor signaling pathway	16/410	137/8008	0.0016414	0.0239232	0.0211182	Sh2d1a/Themis/Cd3e/Cd247/Cd28/Lck/Trat1/Fyb/Ubash3a/Malt1/Cacnb3/Ctla4/Pde4d/Ccr7/Bcl2a1d/Lgals3	16
GO:0002757	immune response-activating signal transduction	16/410	137/8008	0.0016414	0.0239232	0.0211182	Sh2d1a/Themis/Cd3e/Cd247/Cd28/Lck/Trat1/Fyb/Ubash3a/Malt1/Cacnb3/Ctla4/Pde4d/Ccr7/Bcl2a1d/Lgals3	16
GO:0051338	regulation of transferase activity	38/410	453/8008	0.00166073	0.0240351	0.021217	Cd4/Tnfrsf4/Lat/Cdc25b/P2rx7/Ccnf/Il6ra/Tpx2/Ccna2/Cdc6/Cdkn2c/Ccnb2/Aurkb/Malt1/Kif14/Stil/Cenpe/Prkcq/Clspn/Fbxo5/Prkca/Pif1/Psrc1/Mad2l1/Mastl/Nek2/Ccne1/Tigar/Ccnb1/Trib2/Ccr7/Plk1/Ect2/Ccne2/Cdc20/Als2/Cd200/Csf1	38
GO:0007098	centrosome cycle	13/410	100/8008	0.00167396	0.0240351	0.021217	Kif11/Sgo1/Ccnf/Ndc80/Pclaf/Stil/Brca1/Kifc1/Nek2/Plk1/Wdr62/Aurka/Chek1	13
GO:0051299	centrosome separation	4/410	11/8008	0.00167578	0.0240351	0.021217	Kif11/Nek2/Aurka/Chek1	4
GO:0051446	positive regulation of meiotic cell cycle	4/410	11/8008	0.00167578	0.0240351	0.021217	Cdc25b/Rad51ap1/Fbxo5/Cdc25c	4
GO:0032673	regulation of interleukin-4 production	5/410	18/8008	0.00168893	0.0241276	0.0212986	Cd40lg/Cd3e/Cd28/Lef1/Prkcq	5
GO:0046631	alpha-beta T cell activation	15/410	125/8008	0.00173131	0.0246353	0.0217468	Cd3e/Cd28/Slamf6/Tnfsf8/Il6ra/Malt1/Lef1/Prkcq/Myb/Sh3rf1/Btla/Ccr7/Lgals7/Il21/Cd80	15
GO:0030098	lymphocyte differentiation	26/410	276/8008	0.00186263	0.0263994	0.0233041	Cd4/Cd40lg/Slamf1/Themis/Cd3e/Cd28/Cd3d/Lck/Slamf6/Tnfsf8/Itm2a/Cd3g/Fancd2/Il6ra/Malt1/Lef1/Dpp4/Il10/Ctla4/Myb/Sh3rf1/Lgals1/Ccr7/Il21/Ccr6/Bcl2a1d	26
GO:0001816	cytokine production	37/410	442/8008	0.00197919	0.0279415	0.0246653	Cd4/Cd40lg/Slamf1/Cd2/Cd3e/Cd247/Cd28/Tnfrsf4/Slamf6/Cd6/P2rx7/Ndrg2/Il6ra/Ubash3a/Pola1/Malt1/Lef1/F2rl1/Il10/Zbtb32/Syt11/Pde4d/Prkcq/Brca1/Acp5/Tigit/Tnfrsf8/Trib2/Ccr7/Rnf125/Lgals7/Il21/Maf/Il12rb2/Dhx58/Cd200/Oas3	37
GO:0097530	granulocyte migration	10/410	67/8008	0.00199902	0.0281112	0.0248151	Slamf1/Dpp4/Pde4d/Prkca/Ripor2/Ccr7/Sell/Cxcr1/Lgals3/Csf1	10
GO:0071887	leukocyte apoptotic process	12/410	90/8008	0.00200706	0.0281144	0.024818	Tnfrsf4/Cd3g/P2rx7/Aurkb/Il10/Prkcq/Fasl/Ccr7/Il21/Hsh2d/St6gal1/Lgals3	12
GO:0002335	mature B cell differentiation	6/410	27/8008	0.00205076	0.0286152	0.02526	Itm2a/Malt1/Dpp4/Il10/Lgals1/Il21	6
GO:0000077	DNA damage checkpoint signaling	12/410	91/8008	0.00220784	0.0305702	0.0269858	Fancd2/Cdk1/Ticrr/Dtl/Rnaseh2b/Clspn/Brca1/E2f1/Plk1/Chek2/Eme1/Chek1	12
GO:0065004	protein-DNA complex assembly	12/410	91/8008	0.00220784	0.0305702	0.0269858	Dlgap5/Cenpa/Cenph/Oip5/Cenpe/Kntc1/Rad51/Asf1b/Cenpi/Cenpv/Chaf1a/Cenps	12
GO:0030003	cellular cation homeostasis	26/410	281/8008	0.00239578	0.0327789	0.0289355	Cd4/Gpr174/Lck/Got1/P2rx7/Mcub/S1pr1/F2rl1/Cacnb3/Pde4d/Tesc/Fasl/Prkca/Mt1/Hexb/Ccr7/P2ry10b/Tbxa2r/F2rl3/Slc39a8/Cxcr3/Ccr6/Gna15/Gpr55/Cxcr1/Mt2	26
GO:0036336	dendritic cell migration	4/410	12/8008	0.00241289	0.0327789	0.0289355	Slamf1/Ext1/Ccr7/Ccr6	4
GO:0040020	regulation of meiotic nuclear division	4/410	12/8008	0.00241289	0.0327789	0.0289355	Rad51ap1/Fbxo5/Trip13/Cdc20	4
GO:0043383	negative T cell selection	4/410	12/8008	0.00241289	0.0327789	0.0289355	Themis/Cd3e/Cd28/Ccr7	4
GO:1902969	mitotic DNA replication	4/410	12/8008	0.00241289	0.0327789	0.0289355	Pola1/Rad51/Gins3/Gins1	4
GO:0006468	protein phosphorylation	59/410	802/8008	0.00243808	0.0329965	0.0291276	Cd4/Slfn1/Cd3e/Tnfrsf4/Lck/Cd6/Birc5/Cit/Lat/Cdc25b/Bub1/P2rx7/Ccnf/Cdk1/Il6ra/Tpx2/Ccna2/Cdc6/Cdkn2c/Ccnb2/Aurkb/Malt1/Kif14/Ttk/Stil/Cenpe/Pde4d/Prkcq/Clspn/Prkca/Rad51/Pmepa1/Psrc1/Mastl/Nek2/Ddit4/Ccne1/Inpp5f/Melk/Ccnb1/Trib2/Ccr7/Plk1/Ect2/Pbk/Nme2/Fam20a/Il21/Ccne2/Aurka/Haspin/Chek2/Als2/Tgfbr3/Il12rb2/Chek1/Csf1/Mmp9/Cd80	59
GO:0055080	cation homeostasis	28/410	311/8008	0.00246927	0.0332935	0.0293898	Cd4/Gpr174/Lck/Got1/P2rx7/Mcub/S1pr1/F2rl1/Cacnb3/Pde4d/Tesc/Fasl/Prkca/Ext1/Mt1/Hexb/Ccr7/P2ry10b/Fam20a/Tbxa2r/F2rl3/Slc39a8/Cxcr3/Ccr6/Gna15/Gpr55/Cxcr1/Mt2	28
GO:2000106	regulation of leukocyte apoptotic process	10/410	69/8008	0.00250249	0.0336156	0.0296741	Tnfrsf4/Cd3g/P2rx7/Aurkb/Il10/Prkcq/Ccr7/Hsh2d/St6gal1/Lgals3	10
GO:0045785	positive regulation of cell adhesion	24/410	253/8008	0.00251298	0.0336309	0.0296876	Cd4/Cd40lg/Cd5/Slamf1/Cd3e/Cd28/Lck/Adk/Cd6/Il6ra/Malt1/Lef1/Dpp4/Pde4d/Prkcq/Itga6/Myb/Prkca/Lgals1/Ccr7/Il21/Chst2/Csf1/Cd80	24
GO:0051251	positive regulation of lymphocyte activation	20/410	197/8008	0.00257496	0.0342367	0.0302224	Cd4/Cd40lg/Cd5/Slamf1/Cd3e/Cd28/Tnfrsf4/Lck/Adk/Cd6/Malt1/Lef1/Dpp4/Il10/Prkcq/Myb/Lgals1/Ccr7/Il21/Cd80	20
GO:0045859	regulation of protein kinase activity	28/410	312/8008	0.00258677	0.0342367	0.0302224	Cd4/Tnfrsf4/Lat/Cdc25b/P2rx7/Ccnf/Il6ra/Tpx2/Ccna2/Cdc6/Cdkn2c/Ccnb2/Malt1/Kif14/Stil/Cenpe/Clspn/Prkca/Psrc1/Ccne1/Ccnb1/Trib2/Ccr7/Plk1/Ect2/Ccne2/Als2/Csf1	28
GO:0048609	multicellular organismal reproductive process	28/410	312/8008	0.00258677	0.0342367	0.0302224	Racgap1/Ncaph/Cit/Cdc25b/Fancd2/Ndc80/Ccnb2/Aspm/Top2a/Ttk/Cenpe/Fbxo5/Cip2a/Mcm8/Prdx4/Mastl/Ift27/Brip1/Ccnb1/Paqr7/Hexb/Plk1/Fignl1/Aurka/Ggt7/Ccr6/Trip13/Cyp11a1	28
GO:0098771	inorganic ion homeostasis	28/410	313/8008	0.00270903	0.0357234	0.0315348	Cd4/Gpr174/Lck/Got1/P2rx7/Mcub/S1pr1/F2rl1/Cacnb3/Pde4d/Tesc/Fasl/Prkca/Ext1/Mt1/Hexb/Ccr7/P2ry10b/Fam20a/Tbxa2r/F2rl3/Slc39a8/Cxcr3/Ccr6/Gna15/Gpr55/Cxcr1/Mt2	28
GO:0006873	cellular ion homeostasis	26/410	284/8008	0.00277437	0.0364516	0.0321776	Cd4/Gpr174/Lck/Got1/P2rx7/Mcub/S1pr1/F2rl1/Cacnb3/Pde4d/Tesc/Fasl/Prkca/Mt1/Hexb/Ccr7/P2ry10b/Tbxa2r/F2rl3/Slc39a8/Cxcr3/Ccr6/Gna15/Gpr55/Cxcr1/Mt2	26
GO:0002521	leukocyte differentiation	32/410	374/8008	0.00281007	0.0367863	0.0324731	Cd4/Cd40lg/Slamf1/Themis/Cd3e/Cd28/Cd3d/Lck/Slamf6/Tnfsf8/Itm2a/Cd3g/Fancd2/Il6ra/Malt1/Lef1/Dpp4/F2rl1/Il10/Ctla4/Tesc/Myb/Prkca/Sh3rf1/Lgals1/Ccr7/Nme2/Il21/Ccr6/Gpr55/Bcl2a1d/Csf1	32
GO:0000724	double-strand break repair via homologous recombination	12/410	94/8008	0.00291077	0.0379666	0.0335149	Rad51ap1/Timeless/Brca1/Parpbp/Rad51/Rad54l/Mcm8/Gins2/Aunip/Fignl1/Chek1/Recql4	12
GO:0046640	regulation of alpha-beta T cell proliferation	6/410	29/8008	0.00301769	0.0392191	0.0346206	Cd3e/Cd28/Sh3rf1/Btla/Lgals7/Cd80	6
GO:0030217	T cell differentiation	20/410	200/8008	0.00307178	0.0396115	0.034967	Cd4/Themis/Cd3e/Cd28/Cd3d/Lck/Slamf6/Tnfsf8/Cd3g/Fancd2/Il6ra/Malt1/Lef1/Ctla4/Myb/Sh3rf1/Ccr7/Il21/Ccr6/Bcl2a1d	20
GO:0019932	second-messenger-mediated signaling	13/410	107/8008	0.00308477	0.0396115	0.034967	Cd4/Cd3e/Trat1/Lat/Pde4d/Mt1/Rnf157/Ccr7/Tbxa2r/Cxcr3/Ccr6/Cxcr1/Mt2	13
GO:0002687	positive regulation of leukocyte migration	10/410	71/8008	0.0031029	0.0396115	0.034967	Slamf1/F2rl1/Lgmn/Ripor2/Ccr7/Ccr6/Sell/Lgals3/Csf1/Mmp9	10
GO:0031109	microtubule polymerization or depolymerization	10/410	71/8008	0.0031029	0.0396115	0.034967	Kif2c/Ska1/Kif18b/Tpx2/Fbxo5/Stmn1/Psrc1/Ckap2/Ska3/Ska2	10
GO:0070227	lymphocyte apoptotic process	10/410	71/8008	0.0031029	0.0396115	0.034967	Tnfrsf4/Cd3g/P2rx7/Aurkb/Il10/Prkcq/Fasl/Il21/Hsh2d/Lgals3	10
GO:0000725	recombinational repair	12/410	95/8008	0.00318185	0.0403332	0.0356041	Rad51ap1/Timeless/Brca1/Parpbp/Rad51/Rad54l/Mcm8/Gins2/Aunip/Fignl1/Chek1/Recql4	12
GO:0070507	regulation of microtubule cytoskeleton organization	12/410	95/8008	0.00318185	0.0403332	0.0356041	Tacc3/Ska1/Spag5/Tpx2/Stmn1/Psrc1/Gpsm2/Ckap2/Ripor2/Plk1/Ska3/Ska2	12
GO:0001817	regulation of cytokine production	34/410	408/8008	0.00321471	0.0406068	0.0358456	Cd40lg/Slamf1/Cd2/Cd3e/Cd28/Tnfrsf4/Slamf6/Cd6/P2rx7/Ndrg2/Il6ra/Ubash3a/Pola1/Malt1/Lef1/F2rl1/Il10/Zbtb32/Syt11/Pde4d/Prkcq/Brca1/Acp5/Tigit/Tnfrsf8/Trib2/Ccr7/Rnf125/Lgals7/Il21/Il12rb2/Dhx58/Cd200/Oas3	34
GO:0050801	ion homeostasis	29/410	332/8008	0.00324919	0.0408988	0.0361034	Cd4/Gpr174/Lck/Got1/P2rx7/Mcub/S1pr1/F2rl1/Cacnb3/Pde4d/Tesc/Fasl/Prkca/Ext1/Mt1/Hexb/Ccr7/P2ry10b/Fam20a/Tbxa2r/F2rl3/Slc39a8/Cxcr3/Hsh2d/Ccr6/Gna15/Gpr55/Cxcr1/Mt2	29
GO:0051128	regulation of cellular component organization	84/410	1240/8008	0.00327841	0.041123	0.0363012	Slamf1/Cd28/Ehd3/Zc3h12d/Crbn/Birc5/Tacc3/Cit/Ska1/Spag5/Bub1/P2rx7/Ccnf/Cdca5/Ndc80/Rad51ap1/Nusap1/Tpx2/Cdc6/Ube2c/Cdkn2c/Aurkb/Mki67/Kif14/Dpp4/S1pr1/Top2a/F2rl1/Il10/Ttk/Stil/Celsr1/Cenpe/Syt11/Prkcq/Fbxo5/Zdhhc15/Itga6/Fasl/Stmn1/Cdca2/Prkca/Pif1/Kntc1/Pmepa1/Bub1b/Psrc1/Mad2l1/Gpsm2/Kifc1/Ckap2/Nek2/Gpm6b/Wrap73/Cenpv/Inpp5f/Zdhhc2/Mfsd2a/Ripor2/Tigar/Ccnb1/Adcy6/Lgals1/Inf2/Rnf157/Ccr7/Plk…	84
GO:0009265	2'-deoxyribonucleotide biosynthetic process	4/410	13/8008	0.0033458	0.0414256	0.0365684	Adk/Tyms/Dck/Nme2	4
GO:0032753	positive regulation of interleukin-4 production	4/410	13/8008	0.0033458	0.0414256	0.0365684	Cd40lg/Cd3e/Cd28/Prkcq	4
GO:0046385	deoxyribose phosphate biosynthetic process	4/410	13/8008	0.0033458	0.0414256	0.0365684	Adk/Tyms/Dck/Nme2	4
GO:0031023	microtubule organizing center organization	13/410	108/8008	0.00334857	0.0414256	0.0365684	Kif11/Sgo1/Ccnf/Ndc80/Pclaf/Stil/Brca1/Kifc1/Nek2/Plk1/Wdr62/Aurka/Chek1	13
GO:0021700	developmental maturation	14/410	121/8008	0.00342605	0.0422389	0.0372864	Cdc25b/Kif14/S1pr1/Fbxo5/Zdhhc15/Rflnb/Zdhhc2/Ext1/Ccnb1/Il21/Aurka/Ccr6/Trip13/Cdc20	14
GO:0097529	myeloid leukocyte migration	12/410	96/8008	0.003473	0.0426716	0.0376683	Slamf1/Dpp4/Pde4d/Prkca/Lgmn/Ripor2/Ccr7/Sell/Cxcr1/Cd200/Lgals3/Csf1	12
GO:0045061	thymic T cell selection	5/410	21/8008	0.00353285	0.0432594	0.0381872	Cd3e/Cd28/Cd3d/Cd3g/Ccr7	5
GO:0002683	negative regulation of immune system process	24/410	260/8008	0.00358318	0.0437269	0.0385999	Sh2d1a/Slfn1/Slamf1/Tnfrsf4/Zc3h12d/Ttll12/Ubash3a/Dpp4/Il10/Ctla4/Syt11/Tnfrsf13b/Tigit/Btla/Ripor2/Rnf125/Lgals7/Nme2/Gpr55/Dhx58/Cd200/Lgals3/Oas3/Cd80	24
GO:1901976	regulation of cell cycle checkpoint	6/410	30/8008	0.00361237	0.0439342	0.0387829	Ndc80/Rnaseh2b/Mad2l1/Ccnb1/Aurka/Chek2	6
GO:0045860	positive regulation of protein kinase activity	17/410	162/8008	0.00375325	0.0452963	0.0399852	Cd4/Lat/Cdc25b/P2rx7/Il6ra/Tpx2/Cdc6/Malt1/Kif14/Stil/Cenpe/Clspn/Psrc1/Ccr7/Ect2/Als2/Csf1	17
GO:0007189	adenylate cyclase-activating G protein-coupled receptor signaling pathway	7/410	40/8008	0.00376211	0.0452963	0.0399852	Aplp1/S1pr1/S1pr4/Adcy6/Nme2/Tbxa2r/Cxcr3	7
GO:0050856	regulation of T cell receptor signaling pathway	7/410	40/8008	0.00376211	0.0452963	0.0399852	Sh2d1a/Lck/Trat1/Ubash3a/Malt1/Ccr7/Lgals3	7
GO:0002696	positive regulation of leukocyte activation	21/410	218/8008	0.00382112	0.0458534	0.0404771	Cd4/Cd40lg/Cd5/Slamf1/Cd3e/Cd28/Tnfrsf4/Lck/Adk/Cd6/Malt1/Lef1/Dpp4/F2rl1/Il10/Prkcq/Myb/Lgals1/Ccr7/Il21/Cd80	21
